# Supplementary material for: Copper catalysed alkynylation of tertiary amines with CaC2via sp3 C–H activation
Source: Royal Society of Chemistry journal article supplement (doi:10.1039/c6gc00872k), 2016-01-01

## Supporting Information

### Copper catalysed alkylation of tertiary amines with $\text{CaC}_2$ via $\text{sp}^3$ C-H activation

Siew Ping Teong, Dingyi Yu, Yin Ngai Sum, Yugen Zhang\*

Institute of Bioengineering and Nanotechnology, 31 Biopolis Way, The Nanos, Singapore 138669, Singapore. E-mail: ygzhang@ibn.a-star.edu.sg

#### General Information

All solvents and chemicals used were obtained from commercial suppliers and used directly without any pre-treatment, unless otherwise indicated. All reactions were set up under argon atmosphere unless otherwise stated.

Analytical thin layer chromatography (TLC) was performed using Merck 60 F-254 silica gel plates with visualization by ultraviolet light (254 nm) and/or  $\text{I}_2$  stain.  $^1\text{H}$  and  $^{13}\text{C}$  nuclear magnetic resonance (NMR) spectra were recorded on Bruker AV-400 (400 MHz) spectrometer. Chemical shifts ( $\delta$ ) are reported in parts per million (ppm) with the residual solvent peak of tetramethylsilane used as the internal standard at 0.00 ppm.  $^1\text{H}$  NMR data are reported in the following order: chemical shift, multiplicity (br = broad, s = singlet, d = doublet, t = triplet, q = quartet and m = multiplet), coupling constants (J, Hz), integration and assignment. High resolution mass spectra (HRMS) were recorded on a Bruker micrOTOF-QII spectrometer.

## General Experimental Procedure

### Preparation of Propargylamines

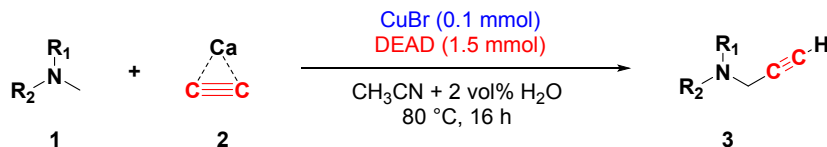

In a 8 mL pressure vial, CaC<sub>2</sub> (2.5 mmol) and CuBr (0.1 mmol) were added. The vial was then purged and refilled with argon thrice before CH<sub>3</sub>CN + 2 vol% H<sub>2</sub>O (5 mL), aliphatic amine (0.5 mmol) and DEAD (1.5 mmol) were added to the vial using a syringe. The reaction was stirred at 80 °C for 16 h, cooled to room temperature before it was diluted with H<sub>2</sub>O (10 mL) and extracted with diethyl ether (3 x 10 mL). The combined organic layer was dried over anhydrous Na<sub>2</sub>SO<sub>4</sub> and concentrated *in vacuo*. The residue was further purified by column chromatography on silica gel to afford the corresponding aliphatic propargylamine. For aromatic amines, CH<sub>3</sub>CN (5 mL) and *t*-BuOOH (2 mmol) were used instead. The NMR spectra data of compounds **3b**<sup>1</sup>, **3f**<sup>2</sup>, **3g**<sup>3</sup> and **5b**<sup>4</sup> are available in the literature and are referenced accordingly.

#### *N*-methyl-*N*-(prop-2-yn-1-yl)cyclohexanamine (**3a**)

This compound was prepared according to general procedure and isolated by column chromatography (ethyl acetate/hexane = 1/8) to give the product as a light yellow liquid (139 mg, 92%). <sup>1</sup>H NMR (400 MHz, CDCl<sub>3</sub>) δ 3.42 (d, *J* = 2.4 Hz, 2H, CH<sub>2</sub>), 2.39 – 2.31 (m, 1H, CH), 2.35 (s, 3H, CH<sub>3</sub>), 2.19 (t, *J* = 2.5 Hz, 1H, C≡CH), 1.92 – 1.90 (m, 2H, CH<sub>2</sub>), 1.78 – 1.75 (m, 2H, CH<sub>2</sub>), 1.62 – 1.59 (m, 1H, CH<sub>2</sub>), 1.31 – 1.08 (m, 5H, CH<sub>2</sub>); <sup>13</sup>C NMR (101 MHz, CDCl<sub>3</sub>) δ 79.8, 72.6, 60.7, 42.9, 38.5, 29.8, 26.0, 25.5; HRMS (EI) *m/z* calcd. for C<sub>10</sub>H<sub>17</sub>N 151.1361; found 151.1358

#### *N*-cyclohexyl-*N*-(prop-2-yn-1-yl)cyclohexanamine (**3b**)<sup>1</sup>

This compound was prepared according to general procedure and isolated by column chromatography (ethyl acetate/hexane = 1/10) to give the product as a light yellow liquid (104 mg, 95%). <sup>1</sup>H NMR (400 MHz, CDCl<sub>3</sub>) δ 3.47 (d, *J* = 2.4 Hz, 2H, CH<sub>2</sub>), 2.78 – 2.72

(tt,  $J = 10.8, 3.3$  Hz, 2H, CH), 2.12 (t,  $J = 2.4$  Hz, 1H, C $\equiv$ CH), 1.85 – 1.75 (m, 8H, CH<sub>2</sub>), 1.62 – 1.59 (m, 2H, CH<sub>2</sub>), 1.34 – 1.05 (m, 10H, CH<sub>2</sub>); <sup>13</sup>C NMR (101 MHz, CDCl<sub>3</sub>)  $\delta$  83.9, 71.0, 57.3, 34.8, 31.2, 26.3, 26.2

### ***N*-methyl-*N*-(prop-2-yn-1-yl)hexan-1-amine (3e)**

This compound was prepared according to general procedure and isolated by column chromatography (ethyl acetate/hexane = 1/10) to give the product as a light yellow liquid (54 mg, 71%). <sup>1</sup>H NMR (400 MHz, CDCl<sub>3</sub>)  $\delta$  3.34 (d,  $J = 2.4$  Hz, 2H, CH<sub>2</sub>), 2.39 (t,  $J = 7.6$  Hz, 2H, CH<sub>2</sub>), 2.30 (s, 3H, CH<sub>3</sub>), 2.21 (t,  $J = 2.4$  Hz, 1H, C $\equiv$ CH), 1.47 – 1.40 (m, 2H, CH<sub>2</sub>), 1.32 – 1.26 (m, 6H, CH<sub>2</sub>), 0.91 – 0.85 (m, 3H, CH<sub>3</sub>); <sup>13</sup>C NMR (101 MHz, CDCl<sub>3</sub>)  $\delta$  78.7, 73.0, 55.8, 45.5, 41.8, 31.8, 27.6, 27.1, 22.7, 14.1; HRMS (EI)  $m/z$  calcd. for C<sub>10</sub>H<sub>19</sub>N 153.1518; found 153.1511

### ***N*-benzyl-*N*-methylprop-2-yn-1-amine (3f)<sup>2</sup>**

This compound was prepared according to general procedure and isolated by column chromatography (ethyl acetate/hexane = 1/16) to give the product as a light yellow liquid (63 mg, 79%). <sup>1</sup>H NMR (400 MHz, CDCl<sub>3</sub>)  $\delta$  7.36 – 7.24 (m, 5H, Ar-H), 3.57 (s, 2H, CH<sub>2</sub>), 3.31 (d,  $J = 2.4$  Hz, 2H, CH<sub>2</sub>), 2.35 (s, 3H, CH<sub>3</sub>), 2.28 (t,  $J = 2.4$  Hz, 1H, C $\equiv$ CH); <sup>13</sup>C NMR (101 MHz, CDCl<sub>3</sub>)  $\delta$  138.3, 129.2, 128.3, 127.3, 78.5, 73.5, 60.0, 44.8, 41.8

### **3-(methyl(prop-2-yn-1-yl)amino)propanenitrile (3g)<sup>3</sup>**

This compound was prepared according to general procedure and isolated by column chromatography (ethyl acetate/hexane = 1/5) to give the product as a light yellow oil (45 mg, 74%). <sup>1</sup>H NMR (400 MHz, CDCl<sub>3</sub>)  $\delta$  3.42 (d,  $J = 2.4$  Hz, 2H, CH<sub>2</sub>), 2.78 (t,  $J = 6.9$  Hz, 2H, CH<sub>2</sub>), 2.51 (t,  $J = 7.0$  Hz, 2H, CH<sub>2</sub>), 2.37 (s, 3H, CH<sub>3</sub>), 2.27 (t,  $J = 2.4$  Hz, 1H, C $\equiv$ CH); <sup>13</sup>C NMR (101 MHz, CDCl<sub>3</sub>)  $\delta$  118.6, 77.5, 73.9, 50.8, 45.4, 41.4, 16.6

### **1-ethynyl-2-methyl-1,2,3,4-tetrahydroisoquinoline (3h)**

This compound was prepared according to general procedure and isolated by column chromatography (ethyl acetate/hexane = 1/6) to give the product as an orange oil (68 mg, 80%). <sup>1</sup>H NMR (400 MHz, CDCl<sub>3</sub>)  $\delta$  7.29 – 7.10 (m, 4H, Ar-H), 4.51 (br s, 1H, CH),

3.02 – 2.92 (m, 2H, CH<sub>2</sub>), 2.89 – 2.80 (m, 1H, CH<sub>2</sub>), 2.74 – 2.65 (m, 1H, CH<sub>2</sub>), 2.56 (s, 3H, CH<sub>3</sub>), 2.41 (d, *J* = 2.3 Hz, 1H, C≡CH); <sup>13</sup>C NMR (101 MHz, CDCl<sub>3</sub>) δ 134.8, 133.4, 129.0, 127.4, 127.1, 126.0, 81.6, 74.2, 56.1, 48.2, 43.5, 28.7; HRMS (EI) *m/z* calcd. for C<sub>12</sub>H<sub>13</sub>N 171.1048; found 171.1042

### **1-(prop-2-yn-1-yl)piperidine (3i)**

This compound was prepared according to general procedure and isolated by column chromatography (ethyl acetate/hexane = 1/4) to give the product as a light yellow liquid (44 mg, 71%). <sup>1</sup>H NMR (400 MHz, CDCl<sub>3</sub>) δ 3.28 (d, *J* = 2.5 Hz, 2H, CH<sub>2</sub>), 2.58 – 2.43 (m, 4H, CH<sub>2</sub>), 2.23 (t, *J* = 2.4 Hz, 1H, C≡CH), 1.65 – 1.59 (m, 4H, CH<sub>2</sub>), 1.48 – 1.39 (m, 2H, CH<sub>2</sub>); <sup>13</sup>C NMR (101 MHz, CDCl<sub>3</sub>) δ 79.3, 72.8, 53.2, 47.6, 25.9, 23.9; HRMS (EI) *m/z* calcd. for C<sub>8</sub>H<sub>13</sub>N 123.1048; found 123.1048

### **Ethyl 1-(prop-2-yn-1-yl)piperidine-4-carboxylate (3j)**

This compound was prepared according to general procedure and isolated by column chromatography (ethyl acetate/hexane = 1/2) to give the product as a light yellow liquid (76 mg, 78%). <sup>1</sup>H NMR (400 MHz, CDCl<sub>3</sub>) δ 4.13 (q, *J* = 7.1 Hz, 2H, CH<sub>2</sub>), 3.31 (d, *J* = 2.4 Hz, 2H, CH<sub>2</sub>), 2.91 – 2.83 (dt, *J* = 11.9, 3.8 Hz, 2H, CH<sub>2</sub>), 2.32 – 2.22 (m, 3H, overlapping CH<sub>2</sub>, CH), 2.25 (t, *J* = 2.4 Hz, 1H, C≡CH), 1.99 – 1.90 (m, 2H, CH<sub>2</sub>), 1.85 – 1.73 (m, 2H, CH<sub>2</sub>), 1.25 (t, *J* = 7.1 Hz, 3H, CH<sub>3</sub>); <sup>13</sup>C NMR (101 MHz, CDCl<sub>3</sub>) δ 175.0, 78.8, 73.2, 60.4, 51.6, 47.1, 40.7, 28.2, 14.2; HRMS (EI) *m/z* calcd. for C<sub>11</sub>H<sub>17</sub>NO<sub>2</sub> 195.1259; found 195.1253

### **4-chloro-1-(prop-2-yn-1-yl)piperidine (3k)**

This compound was prepared according to general procedure and isolated by column chromatography (ethyl acetate/hexane = 1/2) to give the product as a light yellow liquid (55 mg, 70%). <sup>1</sup>H NMR (400 MHz, CDCl<sub>3</sub>) δ 4.04 (br s, 1H, CH), 3.29 (d, *J* = 2.5 Hz, 2H, CH<sub>2</sub>), 2.81 – 2.78 (m, 2H, CH<sub>2</sub>), 2.46 – 2.41 (m, 2H, CH<sub>2</sub>), 2.25 (t, *J* = 2.5 Hz, 1H, C≡CH), 2.14 – 2.10 (m, 2H, CH<sub>2</sub>), 1.97 – 1.90 (m, 2H, CH<sub>2</sub>); <sup>13</sup>C NMR (101 MHz,

CDCl<sub>3</sub>)  $\delta$  78.7, 73.3, 56.7, 49.9, 46.9, 35.4; HRMS (EI)  $m/z$  calcd. for C<sub>8</sub>H<sub>12</sub>CIN 157.0658; found 157.0654

#### ***N*-methyl-*N*-(prop-2-yn-1-yl)aniline (5a)**

This compound was prepared according to general procedure and isolated by column chromatography (toluene/hexane = 1/4) to give the product as a yellow oil (54 mg, 74%). <sup>1</sup>H NMR (400 MHz, CDCl<sub>3</sub>)  $\delta$  7.31 – 7.24 (m, 2H, Ar-H), 6.90 – 6.79 (m, 3H, Ar-H), 4.06 (d,  $J$  = 2.3 Hz, 2H, CH<sub>2</sub>), 2.98 (s, 3H, CH<sub>3</sub>), 2.17 (t,  $J$  = 2.4 Hz, 1H, C $\equiv$ CH); <sup>13</sup>C NMR (101 MHz, CDCl<sub>3</sub>)  $\delta$  149.0, 129.1, 118.4, 114.3, 79.3, 72.0, 42.5, 38.6; HRMS (EI)  $m/z$  calcd. for C<sub>10</sub>H<sub>11</sub>N 145.0892; found 145.0887

#### ***N*,4-dimethyl-*N*-(prop-2-yn-1-yl)aniline (5b)<sup>4</sup>**

This compound was prepared according to general procedure and isolated by column chromatography (toluene/hexane = 1/1) to give the product as a yellow oil (48 mg, 60%). <sup>1</sup>H NMR (400 MHz, CDCl<sub>3</sub>)  $\delta$  7.08 (d,  $J$  = 8.4 Hz, 2H, Ar-H), 6.79 (d,  $J$  = 8.4 Hz, 2H, Ar-H), 4.01 (d,  $J$  = 2.3 Hz, 2H, CH<sub>2</sub>), 2.93 (s, 3H, CH<sub>3</sub>), 2.26 (s, 3H, CH<sub>3</sub>), 2.15 (t,  $J$  = 2.3 Hz, 1H, C $\equiv$ CH); <sup>13</sup>C NMR (101 MHz, CDCl<sub>3</sub>)  $\delta$  147.0, 129.7, 127.9, 114.9, 79.3, 72.1, 43.0, 38.9, 20.4

#### **4-(tert-butyl)-*N*-methyl-*N*-(prop-2-yn-1-yl)aniline (5c)**

This compound was prepared according to general procedure and isolated by column chromatography (toluene/hexane = 1/2) to give the product as a yellow oil (48 mg, 48%). <sup>1</sup>H NMR (400 MHz, CDCl<sub>3</sub>)  $\delta$  7.31 (d,  $J$  = 8.9 Hz, 2H, Ar-H), 6.84 (d,  $J$  = 8.9 Hz, 2H, Ar-H), 4.04 (d,  $J$  = 2.4 Hz, 2H, CH<sub>2</sub>), 2.97 (s, 3H, CH<sub>3</sub>), 2.19 (t,  $J$  = 2.4 Hz, 1H, C $\equiv$ CH), 1.31 (s, 9H, CH<sub>3</sub>); <sup>13</sup>C NMR (101 MHz, CDCl<sub>3</sub>)  $\delta$  146.8, 141.1, 126.0, 114.2, 79.5, 72.1, 42.6, 38.8, 33.9, 31.5; HRMS (EI)  $m/z$  calcd. for C<sub>14</sub>H<sub>19</sub>N 201.1518; found 201.1510

#### **2,6-diisopropyl-*N*-methyl-*N*-(prop-2-yn-1-yl)aniline (5d)**

This compound was prepared according to general procedure and isolated by column chromatography (toluene/hexane = 1/2) to give the product as a yellow oil (58 mg, 51%). <sup>1</sup>H NMR (400 MHz, CDCl<sub>3</sub>)  $\delta$  7.20 – 7.16 (m, 1H, Ar-H), 7.10 – 7.08 (m, 2H, Ar-H),

3.82 (d,  $J = 2.5$  Hz, 2H, CH<sub>2</sub>), 3.34 (m, 2H, CH), 2.90 (s, 3H, CH<sub>3</sub>), 2.23 (t,  $J = 2.5$  Hz, 1H, C≡CH), 1.21 (dd,  $J = 6.9, 1.8$  Hz, 12H, CH<sub>3</sub>); <sup>13</sup>C NMR (101 MHz, CDCl<sub>3</sub>) δ 149.3, 145.9, 126.7, 124.0, 81.6, 71.2, 45.6, 41.1, 28.4, 24.5; HRMS (EI)  $m/z$  calcd. for C<sub>16</sub>H<sub>23</sub>N 229.1831; found 229.1825

#### **2-bromo-*N*-methyl-*N*-(prop-2-yn-1-yl)aniline (5e)**

This compound was prepared according to general procedure and isolated by column chromatography (toluene/hexane = 1/3) to give the product as a yellow oil (77 mg, 69%). <sup>1</sup>H NMR (400 MHz, CDCl<sub>3</sub>) δ 7.57 – 7.55 (m, 1H, Ar-H), 7.30 – 7.21 (m, 2H, Ar-H), 6.96 – 6.92 (m, 1H, Ar-H), 3.94 (d,  $J = 2.4$  Hz, 2H, CH<sub>2</sub>), 2.88 (s, 3H, CH<sub>3</sub>), 2.24 (t,  $J = 2.4$  Hz, 1H, C≡CH); <sup>13</sup>C NMR (101 MHz, CDCl<sub>3</sub>) δ 149.2, 133.8, 128.0, 125.0, 122.7, 119.7, 78.9, 73.2, 45.3, 40.1; HRMS (EI)  $m/z$  calcd. for C<sub>10</sub>H<sub>10</sub>BrN 222.9997; found 222.9991

#### **2-chloro-*N*-methyl-*N*-(prop-2-yn-1-yl)aniline (5f)**

This compound was prepared according to general procedure and isolated by column chromatography (toluene/hexane = 1/2) to give the product as a yellow oil (54 mg, 60%). <sup>1</sup>H NMR (400 MHz, CDCl<sub>3</sub>) δ 7.37 – 7.35 (m, 1H, Ar-H), 7.26 – 7.20 (m, 2H, Ar-H), 7.02 – 6.98 (m, 1H, Ar-H), 3.96 (d,  $J = 2.4$  Hz, 2H, CH<sub>2</sub>), 2.89 (s, 3H, CH<sub>3</sub>), 2.23 (t,  $J = 2.4$  Hz, 1H, C≡CH); <sup>13</sup>C NMR (101 MHz, CDCl<sub>3</sub>) δ 147.8, 130.6, 128.7, 127.3, 124.3, 122.1, 78.9, 73.2, 44.8, 39.9; HRMS (EI)  $m/z$  calcd. for C<sub>10</sub>H<sub>10</sub>ClN 179.0502; found 179.0495

## Procedure for Sonogashira Coupling of Propargylamine

In a 8 mL pressure vial, CuI (0.09 mmol, 17 mg) and Pd(PPh<sub>3</sub>)<sub>4</sub> (0.03 mmol, 34.7 mg) were added. The vial was then purged and refilled with argon thrice before CH<sub>3</sub>CN (3 mL), propargylamine **3a** (1.0 mmol, 151 mg), Et<sub>3</sub>N (5 mmol, 0.7 mL) and PhI (1 mmol, 0.11 mL) were added to the vial using a syringe. The reaction was stirred at 60 °C for 17 h and cooled to room temperature. The resulting mixture was concentrated *in vacuo* and the residue was further purified by column chromatography on silica gel (EA/hexane = 1/8) to afford the corresponding *N*-methyl-*N*-(3-phenylprop-2-yn-1-yl)cyclohexanamine<sup>4</sup> as a yellow oil (188 mg, 83 %). <sup>1</sup>H NMR (400 MHz, CDCl<sub>3</sub>) δ 7.46 – 7.40 (m, 2H, Ar-H), 7.33 – 7.27 (m, 3H, Ar-H), 3.64 (s, 2H, CH<sub>2</sub>), 2.49 – 2.39 (m, 1H, CH), 2.42 (s, 3H, CH<sub>3</sub>), 2.01 – 1.93 (m, 2H, CH<sub>2</sub>), 1.85 – 1.76 (m, 2H, CH<sub>2</sub>), 1.67 – 1.58 (m, 1H, CH<sub>2</sub>), 1.34 – 1.07 (m, 5H, CH<sub>2</sub>); <sup>13</sup>C NMR (101 MHz, CDCl<sub>3</sub>) δ 131.7, 128.3, 127.9, 123.5, 85.7, 84.8, 61.0, 43.7, 38.6, 29.9, 26.1, 25.6 The NMR spectrum data of this compound is available in the literature and referenced accordingly.

**Table S1.** Catalysts and oxidants screening <sup>a</sup>

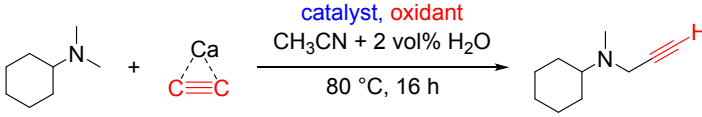

| Entry | Catalyst | Oxidant                                  | Yield <sup>b</sup> (%) |
|-------|----------|------------------------------------------|------------------------|
| 1     | CuBr     | <i>t</i> -BuOOH in decane                | 47                     |
| 2     | CuBr     | <i>t</i> -BuOOH in water                 | 40                     |
| 3     | CuBr     | Cumene hydroperoxide                     | 44                     |
| 4     | CuBr     | Di- <i>t</i> -butyl peroxide             | trace                  |
| 5     | CuBr     | H <sub>2</sub> O <sub>2</sub>            | trace                  |
| 6     | CuBr     | KMnO <sub>4</sub> / NBS / I <sub>2</sub> | NR                     |

<sup>a</sup> Reaction conditions: Amine (1 mmol), CaC<sub>2</sub> (2.5 mmol), catalyst (10 mol%), oxidant (1.5 eq.), CH<sub>3</sub>CN + 2 vol% H<sub>2</sub>O (5 mL), 80 °C, 16 h. <sup>b</sup> NMR yield.

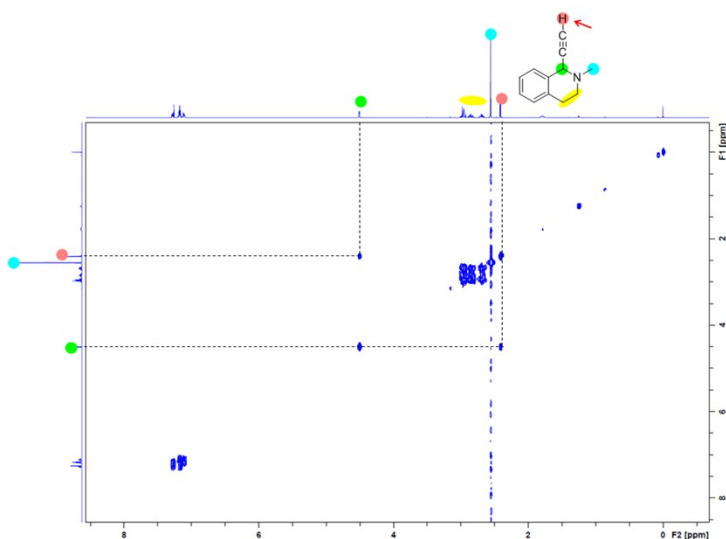

**Figure S1.** COSY NMR of **3h**

**Table S2.** Optimization of reaction conditions for *N,N*-dimethylaniline

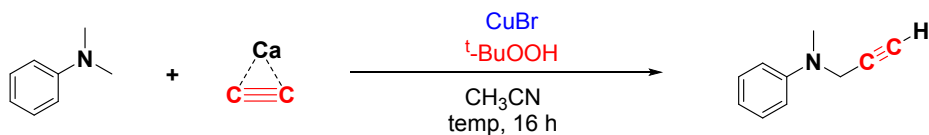

| Entry | Amine<br>(mmol) | t-BuOOH<br>(mmol) | CuBr<br>(mmol) | H <sub>2</sub> O added<br>(vol%) | Additive<br>(eq.) | Temp<br>(°C) | Yield <sup>a</sup><br>(%) |
|-------|-----------------|-------------------|----------------|----------------------------------|-------------------|--------------|---------------------------|
| 1     | 0.5             | 2                 | 0.10           | -                                | -                 | 80           | 70                        |
| 2     | 0.5             | 2                 | 0.10           | 0.25                             | -                 | 80           | 66                        |
| 3     | 0.5             | 2                 | 0.10           | 1                                | -                 | 80           | 45                        |
| 4     | 0.5             | 2                 | 0.10           | 2                                | -                 | 80           | 5                         |
| 5     | 0.5             | 2                 | 0.10           | -                                | TBAB (1)          | 80           | 20                        |
| 6     | 0.5             | 2                 | 0.15           | -                                | -                 | 80           | 59                        |
| 7     | 0.5             | 2                 | 0.20           | -                                | -                 | 80           | 50                        |
| 8     | 0.5             | 1                 | 0.10           | -                                | -                 | 80           | 43                        |
| 9     | 0.5             | 2.5               | 0.10           | -                                | -                 | 80           | 60                        |
| 10    | 0.5             | 3                 | 0.10           | -                                | -                 | 80           | 57                        |



|    |     |   |      |   |   |     |    |
|----|-----|---|------|---|---|-----|----|
| 11 | 0.5 | 2 | 0.10 | - | - | 90  | 79 |
| 12 | 0.5 | 2 | 0.10 | - | - | 100 | 60 |

<sup>a</sup> NMR yield.

**Table S3.** Optimization of reaction conditions for 4,4'-trimethylenebis(1-methylpiperidine) **6**

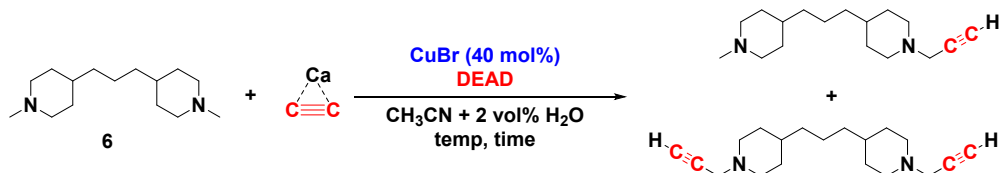

| Entry | DEAD (mmol) | Temp (°C) | Time (h) | Total Yield <sup>a</sup><br>(%) | Mono- : Di-<br>product <sup>a</sup> (%) |
|-------|-------------|-----------|----------|---------------------------------|-----------------------------------------|
| 1     | 3           | 120       | 16       | 77                              | 62 : 15                                 |
| 2     | 4           | 120       | 16       | 87                              | 58 : 29                                 |
| 3     | 4           | 140       | 16       | 75                              | 41 : 34                                 |
| 4     | 4           | 120       | 32       | 65                              | 35 : 30                                 |

<sup>a</sup> NMR yield.

## References

- [1] T. Sugiishi, A. Kimura, H. Nakamura, *J. Am. Chem. Soc.*, **2010**, 132, 5332
- [2] D. P. Chauhan, S. J. Varma, A. Vijeta, P. Banerjee, P. Talukdar, *Chem. Commun.*, **2014**, 50, 323
- [3] Y. Zhou, J. A. Porco, Jr., J. K. Snyder, *Org. Lett.*, **2007**, 9, 393
- [4] C. M. R. Volla, P. Vogel, *Org. Lett.*, **2009**, 11, 1701

# <sup>1</sup>H and <sup>13</sup>C NMR Spectra of Propargylamines

<sup>1</sup>H NMR, CDCl<sub>3</sub>, 400 MHz

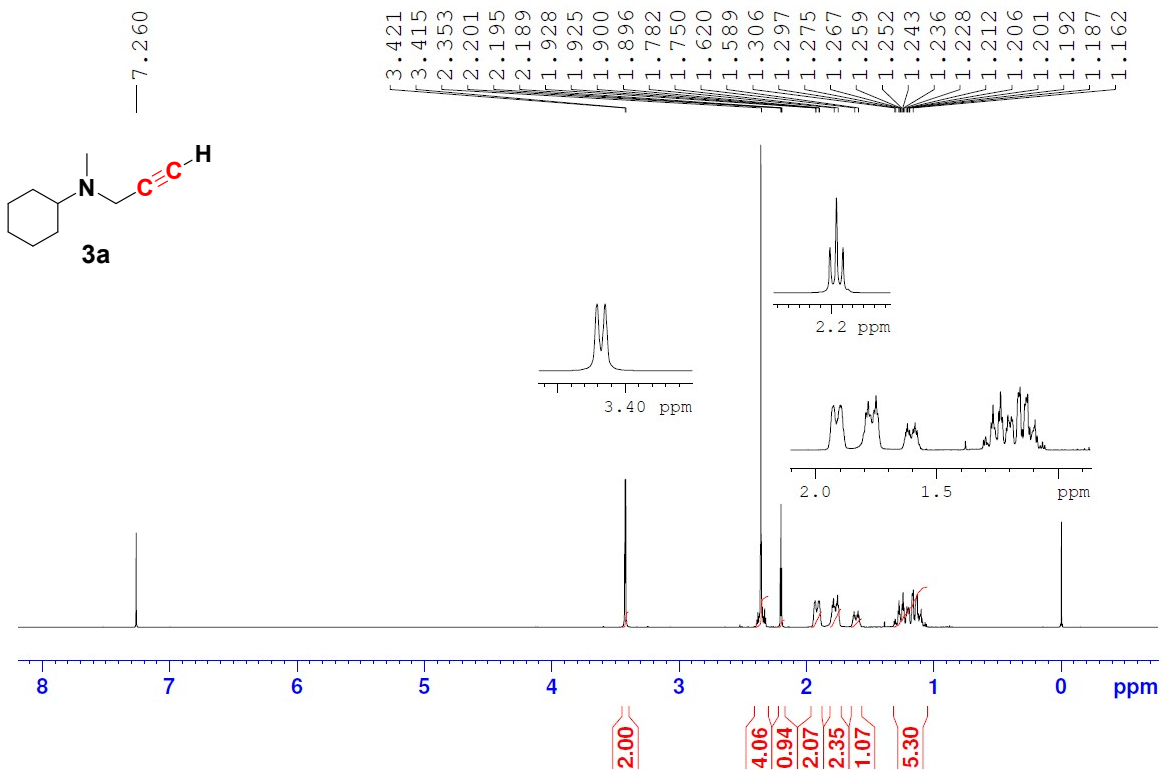

<sup>13</sup>C NMR, CDCl<sub>3</sub>, 101 MHz

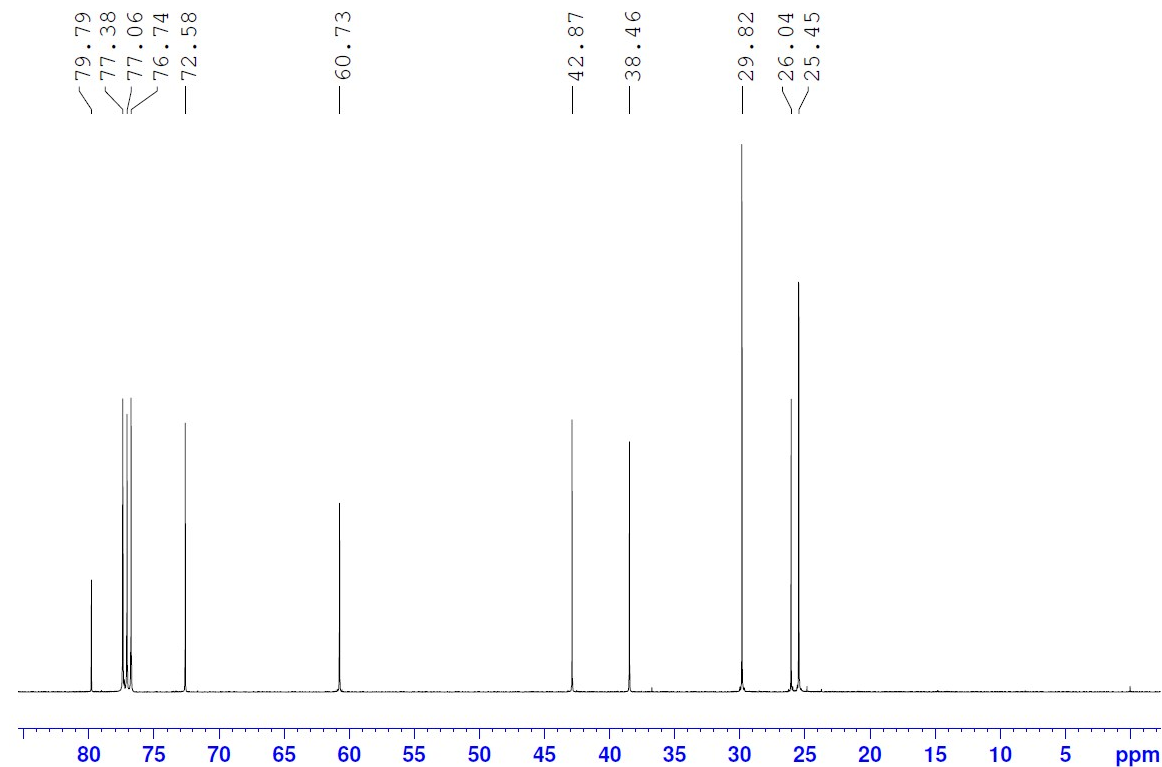

$^1\text{H}$  NMR,  $\text{CDCl}_3$ , 400 MHz

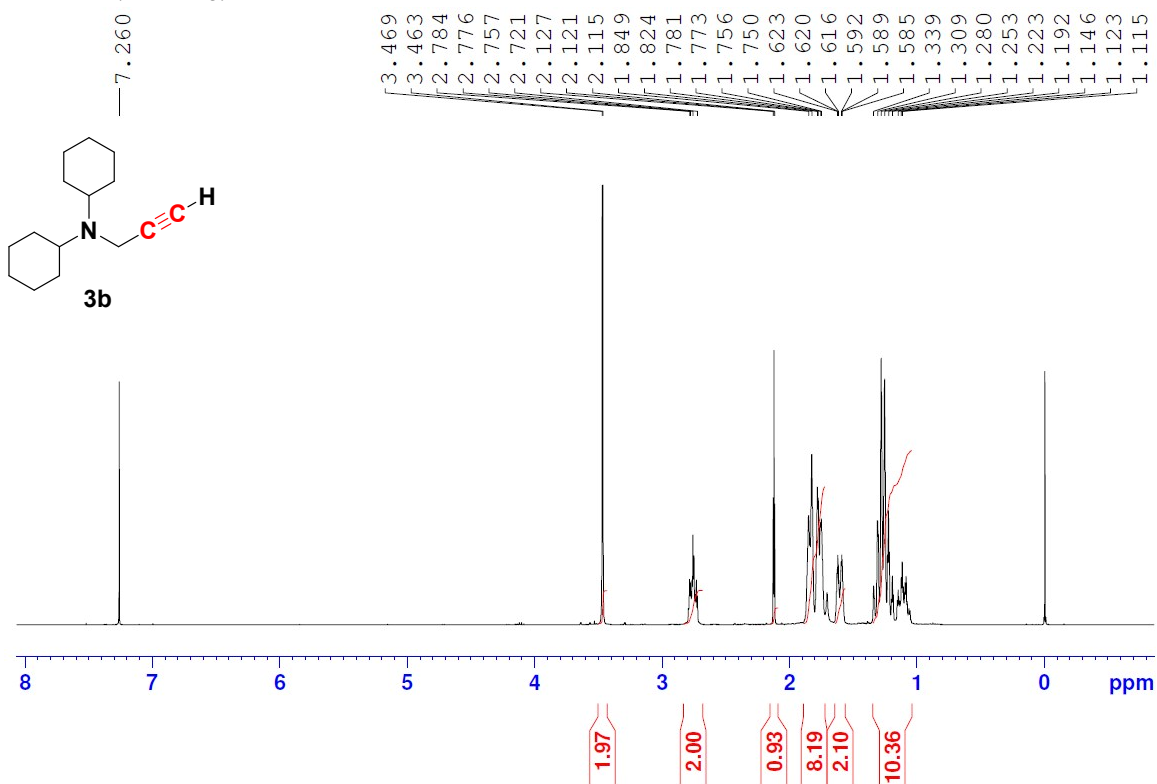

$^{13}\text{C}$  NMR,  $\text{CDCl}_3$ , 101 MHz

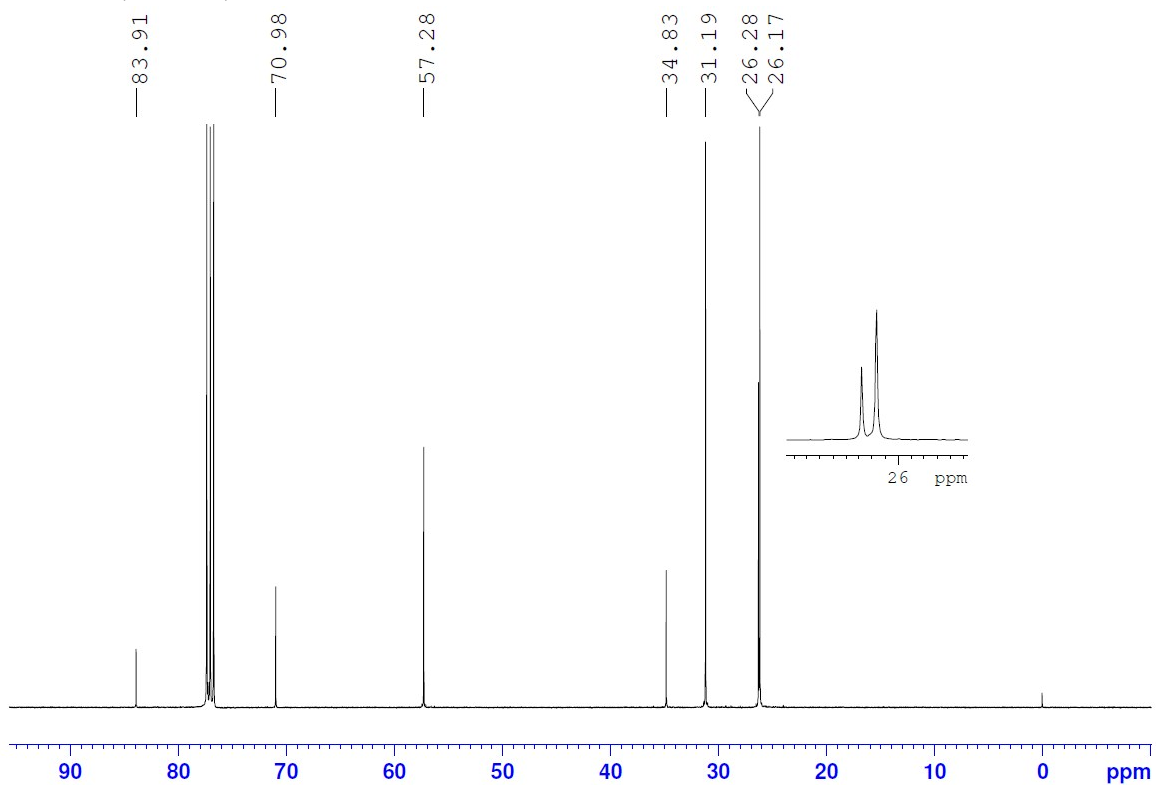

$^1\text{H}$  NMR,  $\text{CDCl}_3$ , 400 MHz

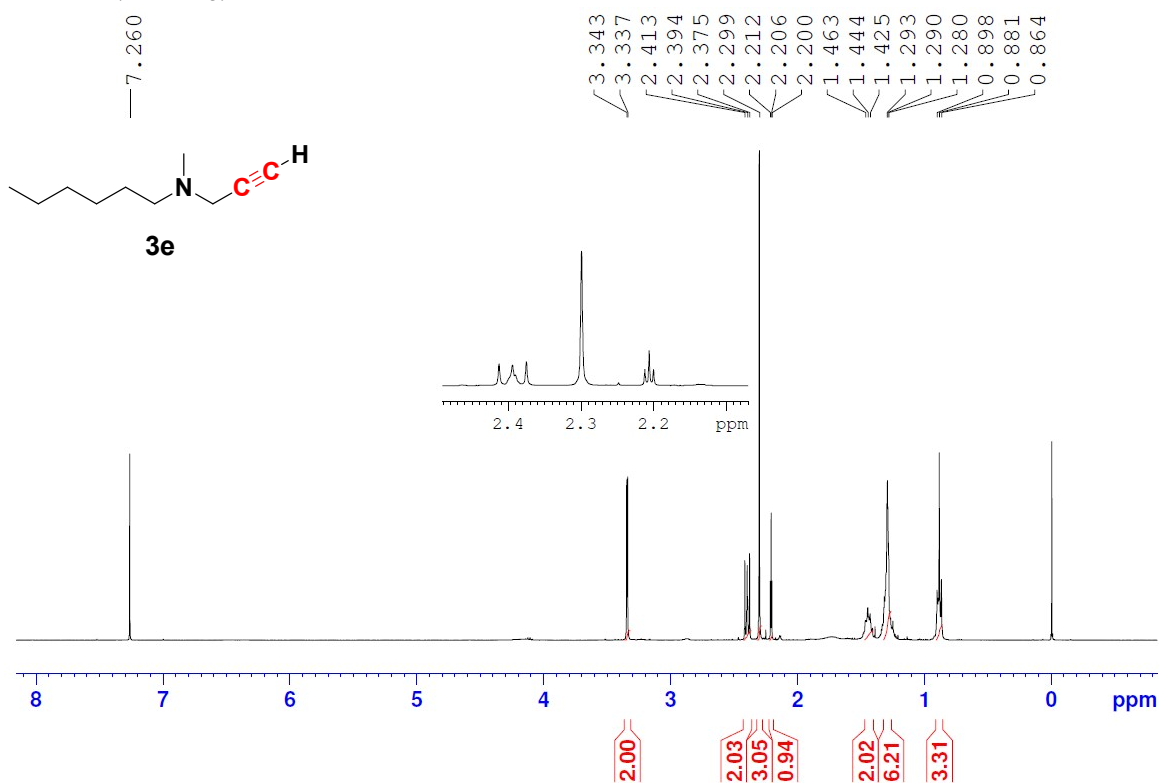

$^{13}\text{C}$  NMR,  $\text{CDCl}_3$ , 101 MHz

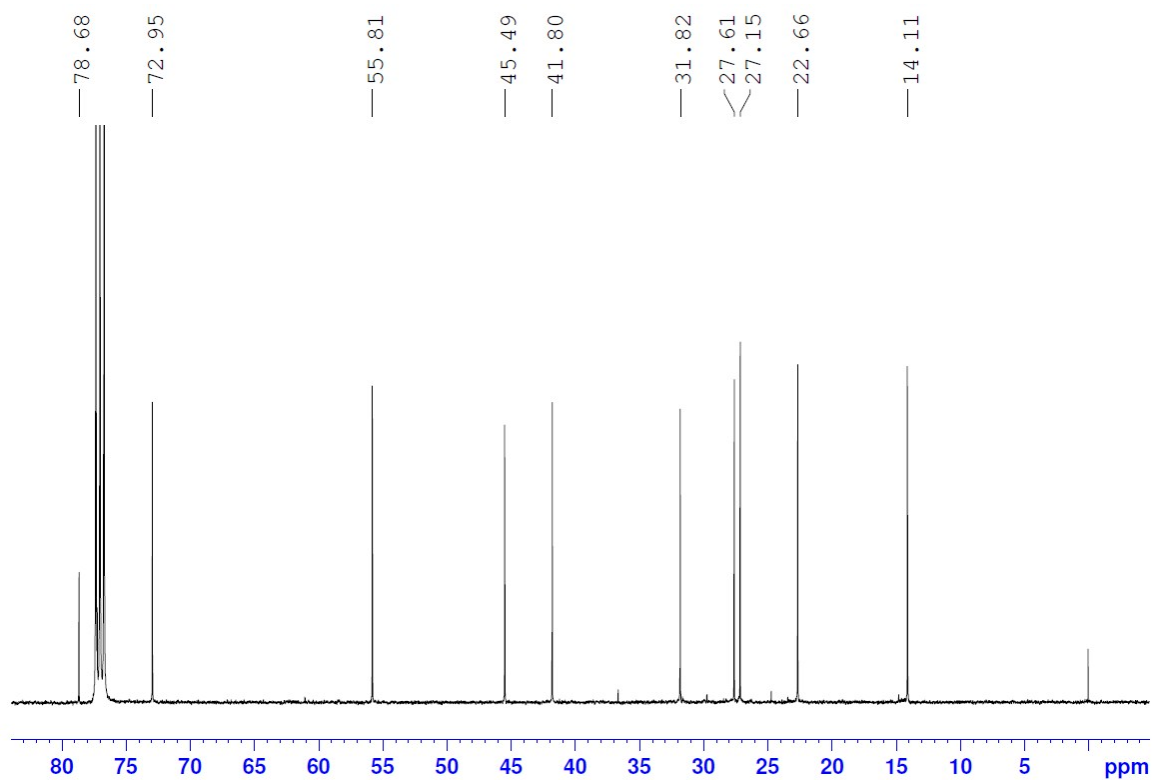

$^1\text{H}$  NMR,  $\text{CDCl}_3$ , 400 MHz

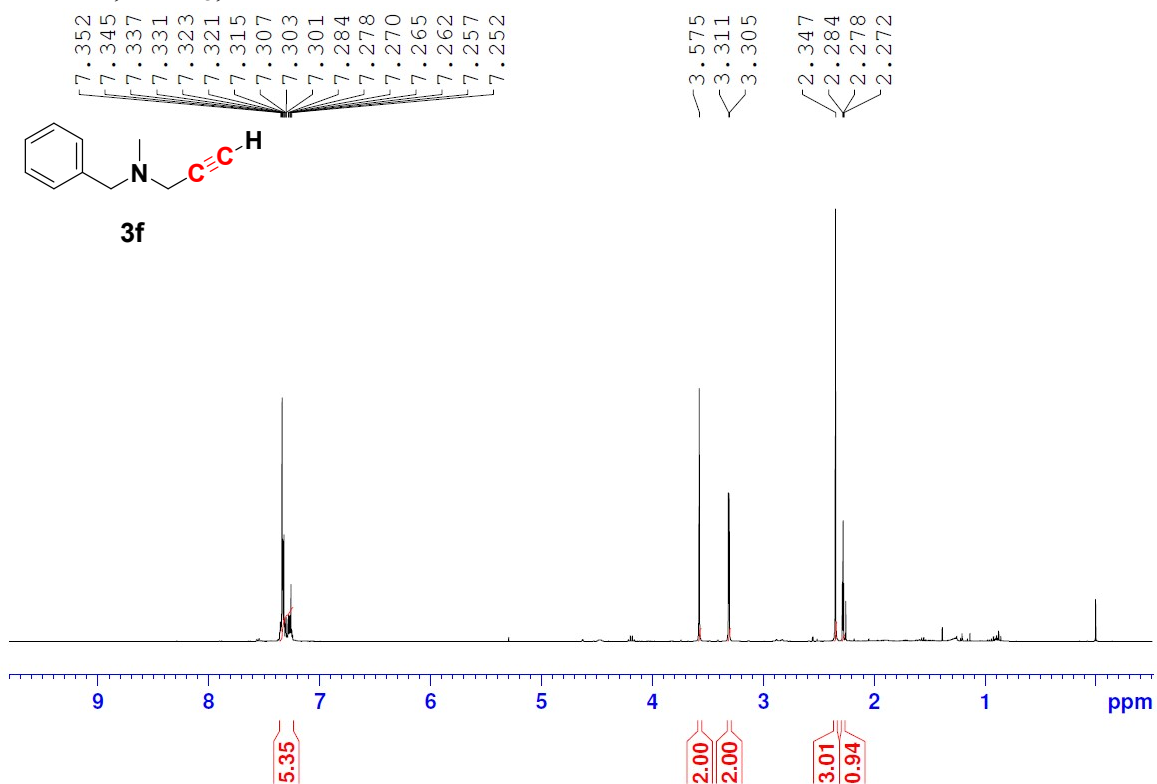

$^{13}\text{C}$  NMR,  $\text{CDCl}_3$ , 101 MHz

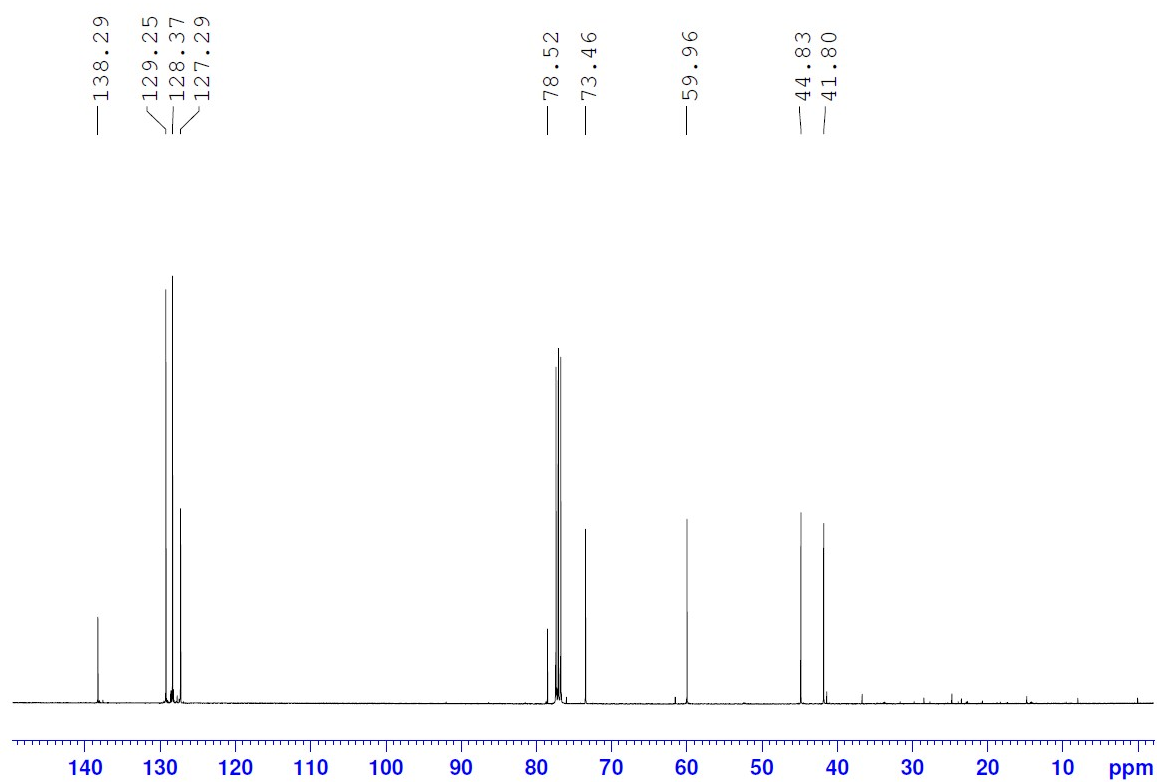

$^1\text{H}$  NMR,  $\text{CDCl}_3$ , 400 MHz

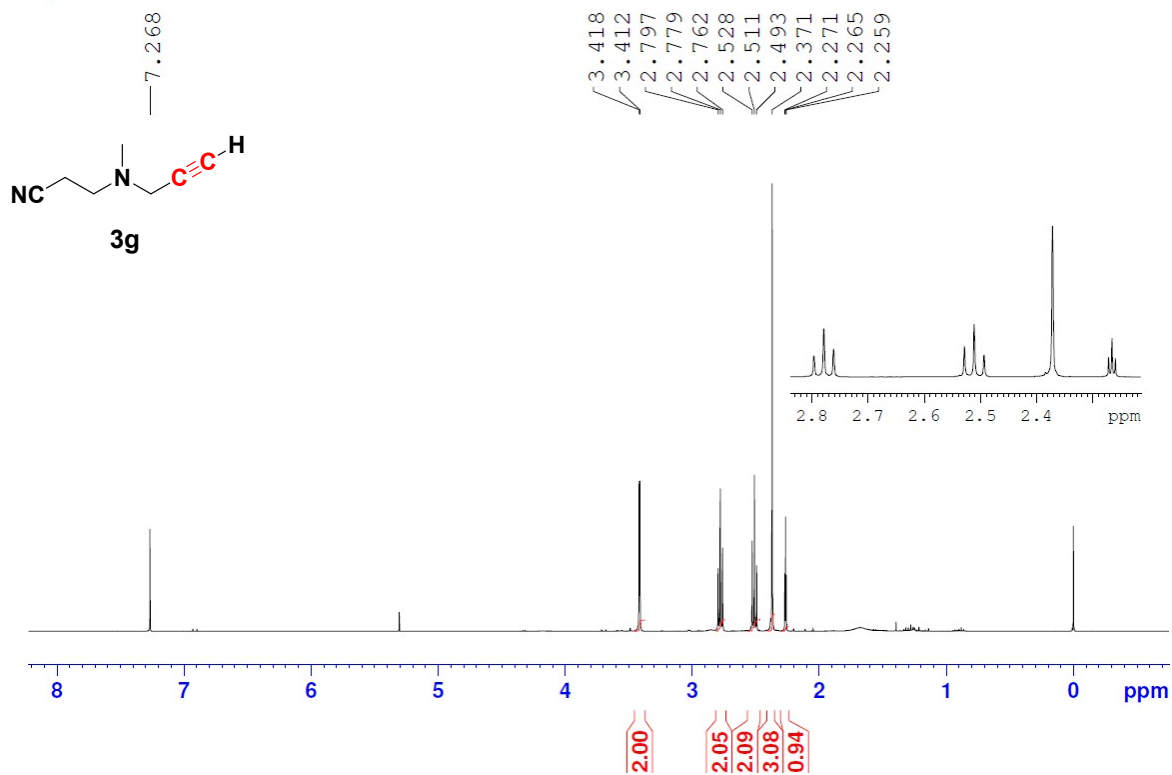

$^{13}\text{C}$  NMR,  $\text{CDCl}_3$ , 101 MHz

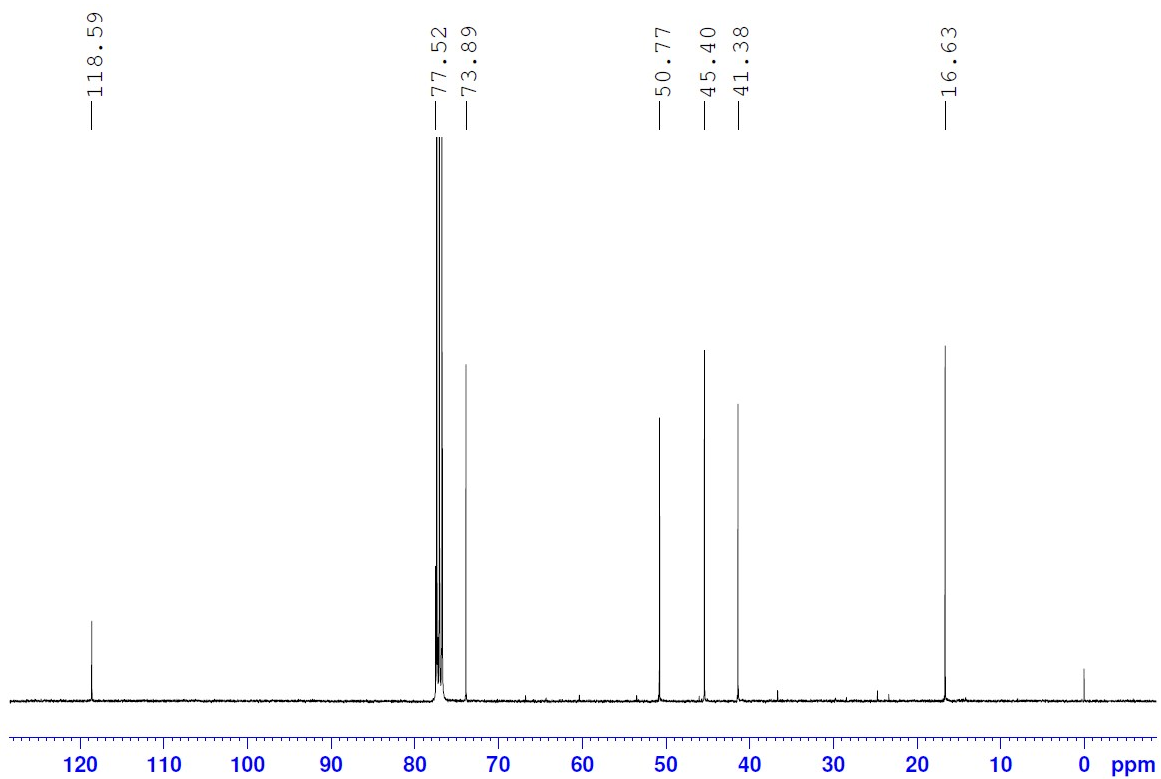

$^1\text{H}$  NMR,  $\text{CDCl}_3$ , 400 MHz

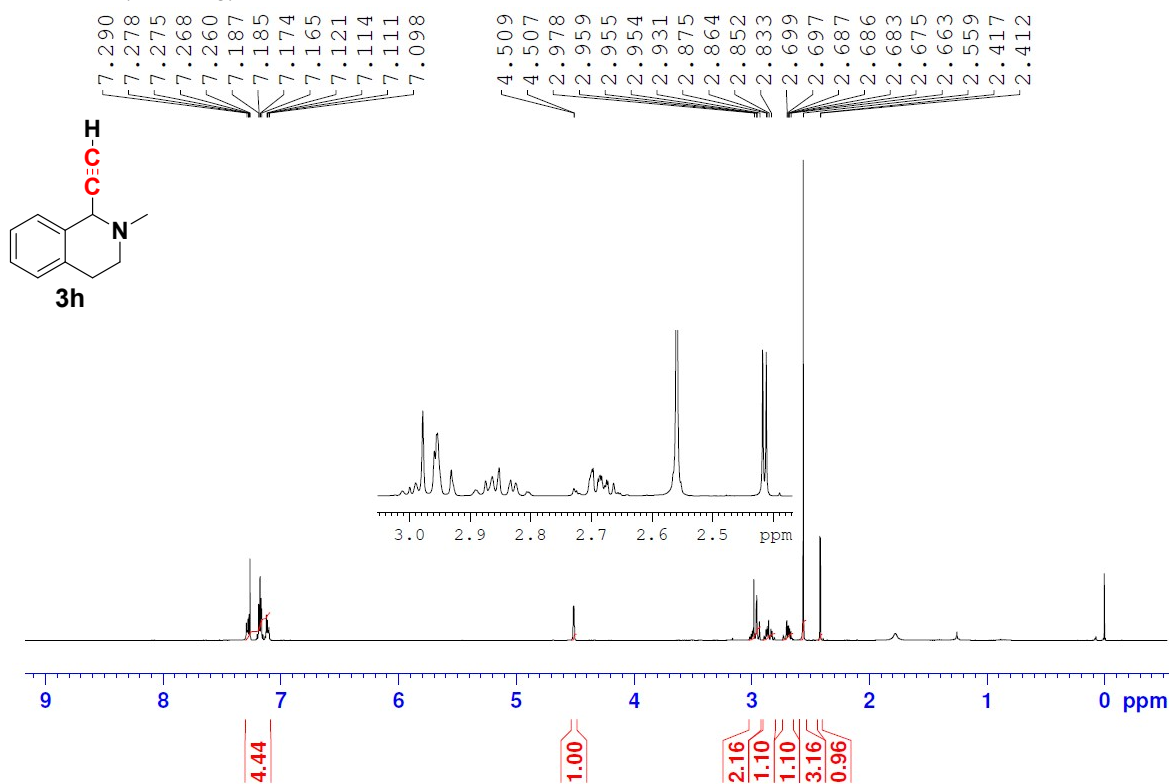

$^{13}\text{C}$  NMR,  $\text{CDCl}_3$ , 101 MHz

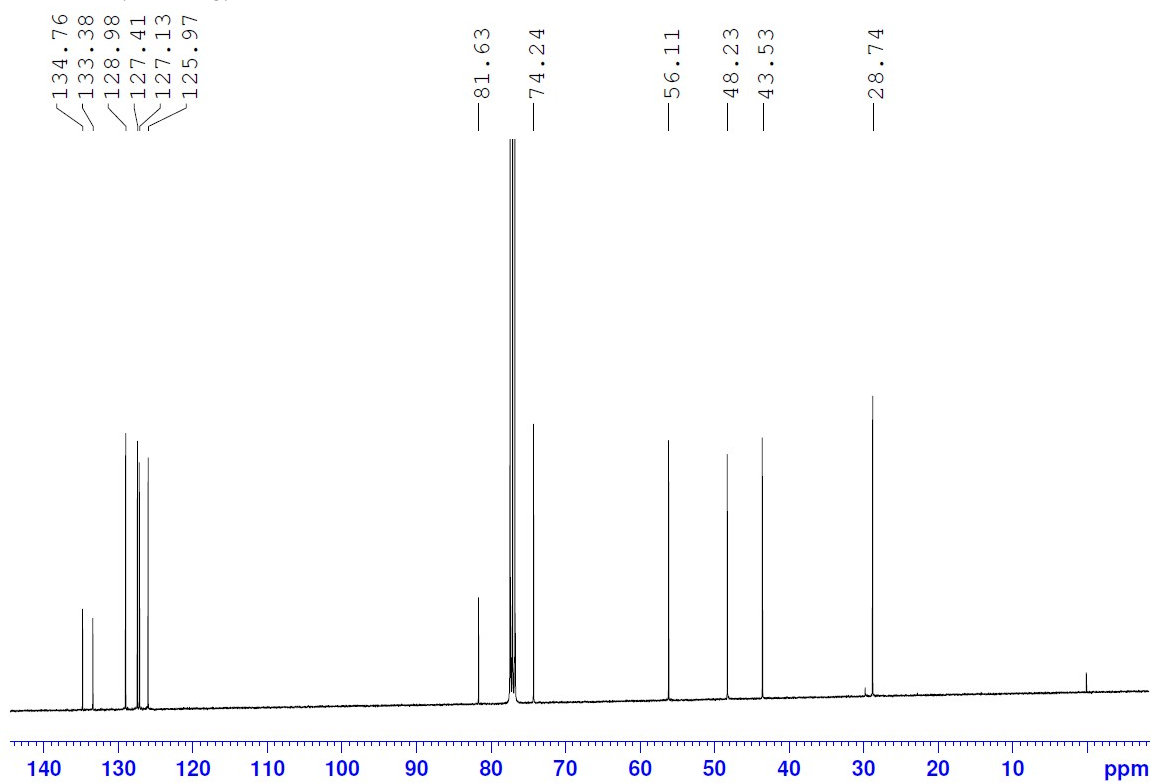

$^1\text{H}$  NMR,  $\text{CDCl}_3$ , 400 MHz

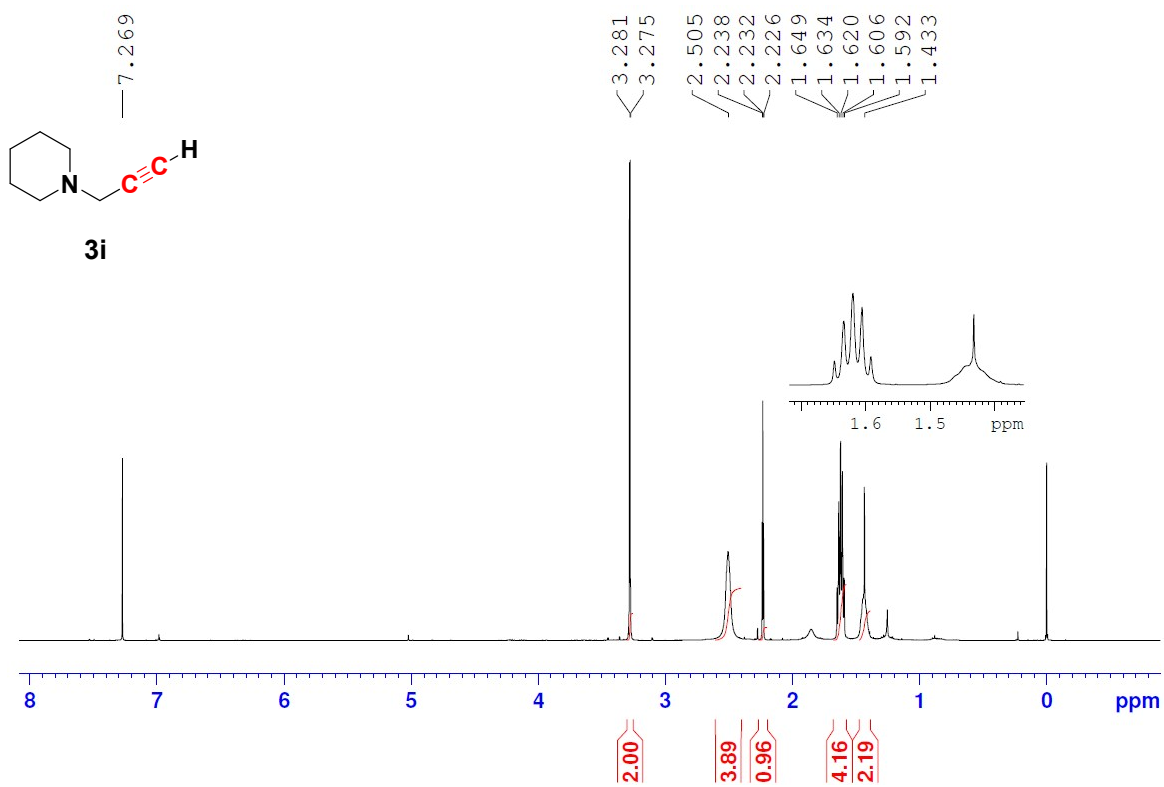

$^{13}\text{C}$  NMR,  $\text{CDCl}_3$ , 101 MHz

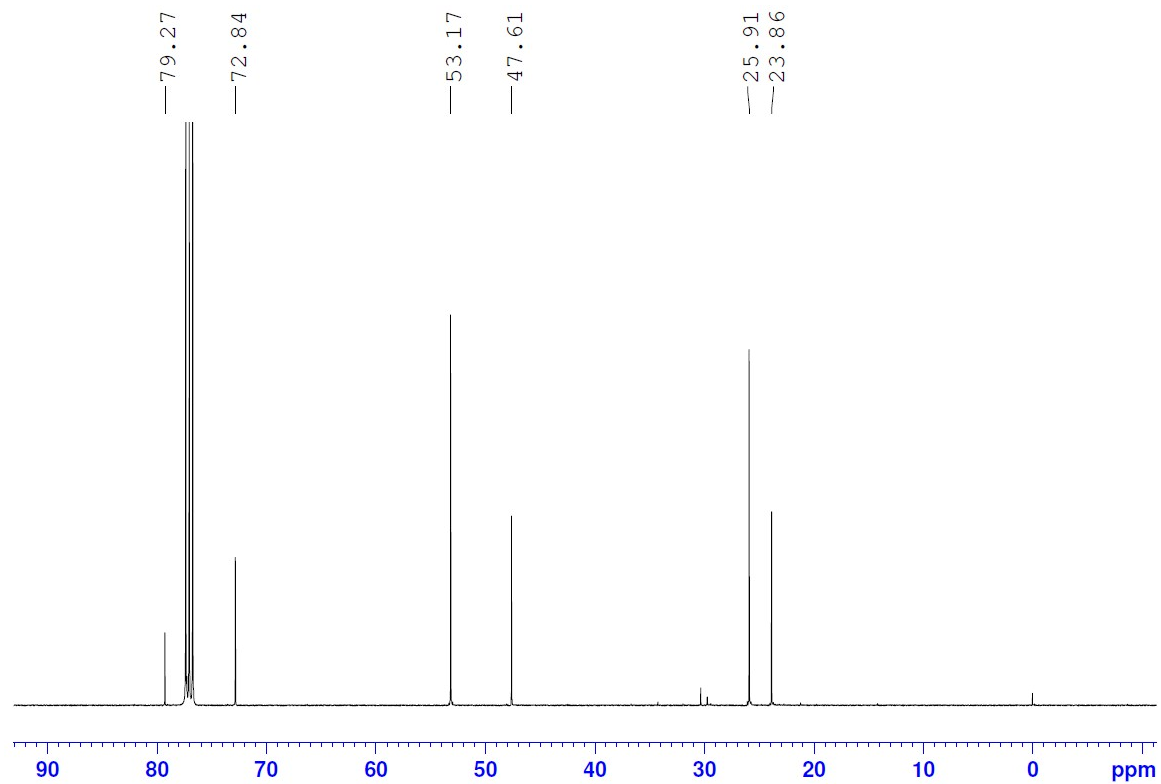



$^1\text{H}$  NMR,  $\text{CDCl}_3$ , 400 MHz

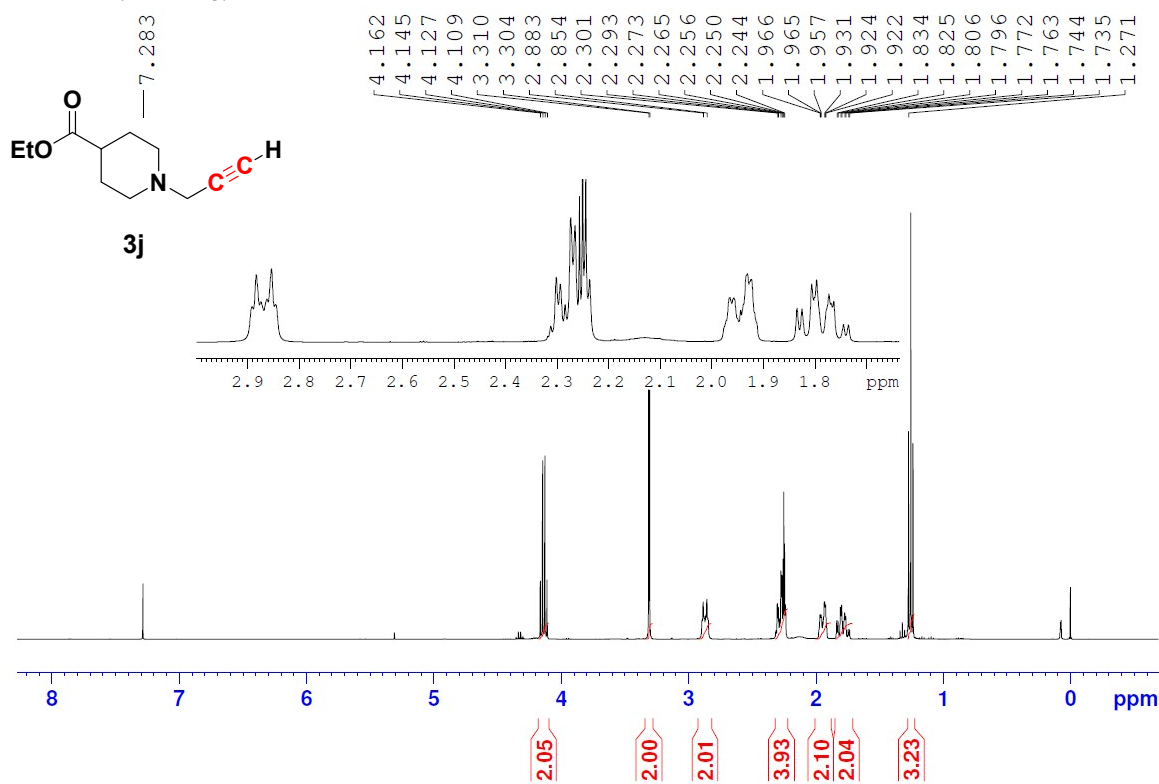

$^{13}\text{C}$  NMR,  $\text{CDCl}_3$ , 101 MHz

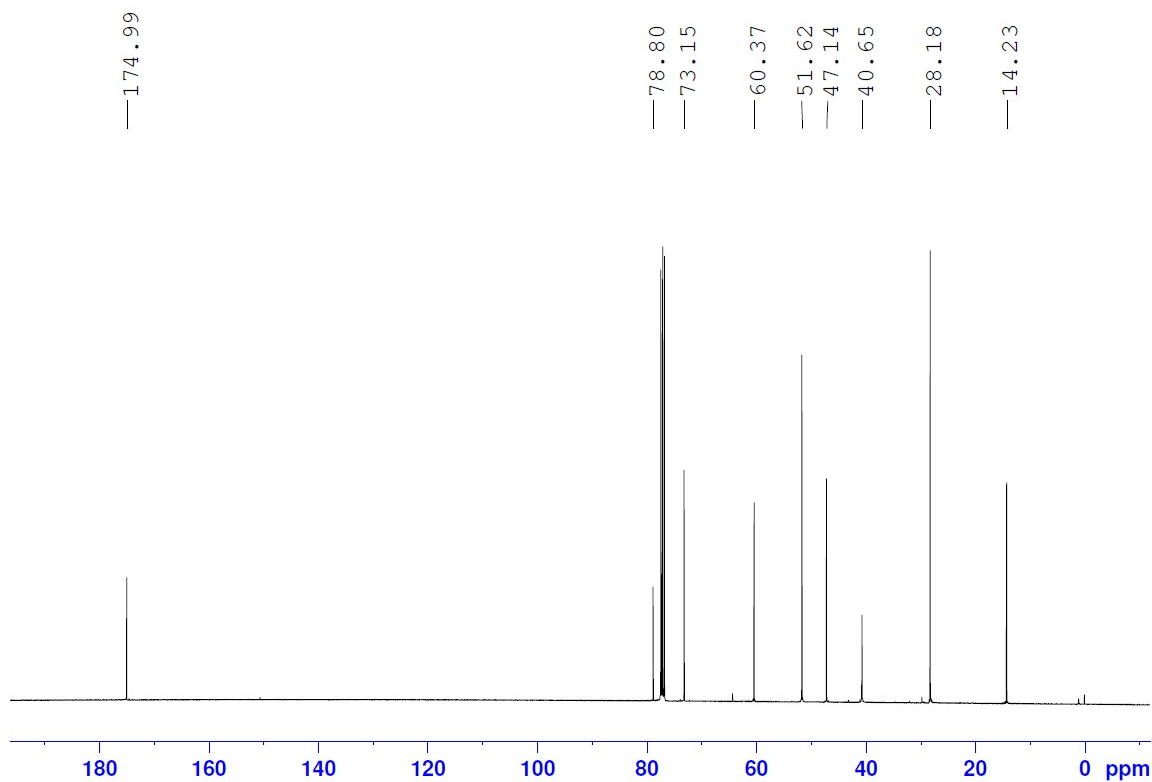

$^1\text{H}$  NMR,  $\text{CDCl}_3$ , 400 MHz

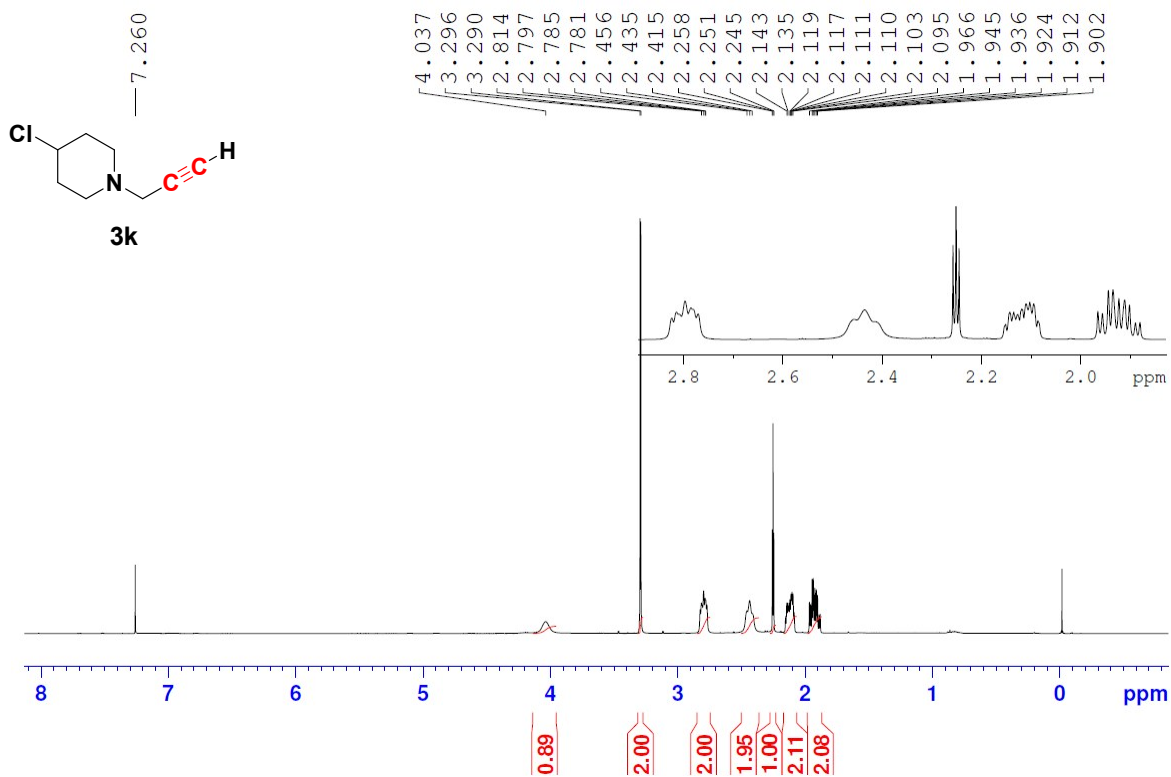

$^{13}\text{C}$  NMR,  $\text{CDCl}_3$ , 101 MHz

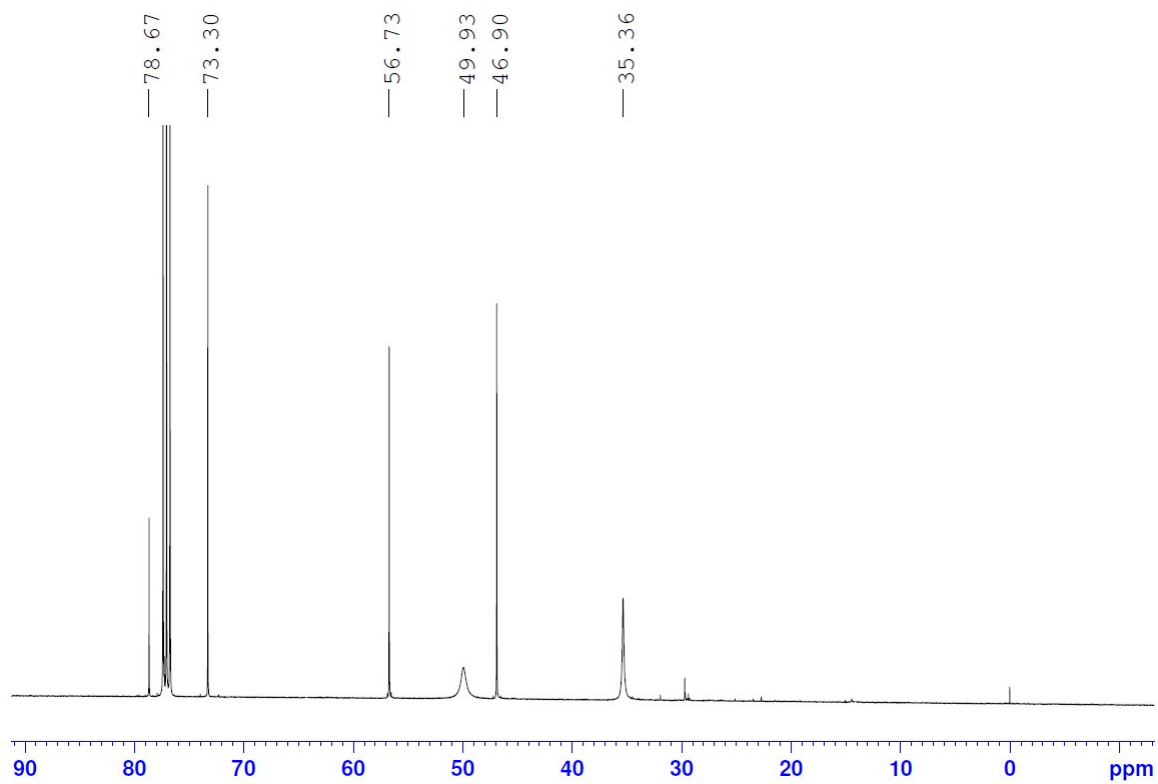

$^1\text{H}$  NMR,  $\text{CDCl}_3$ , 400 MHz

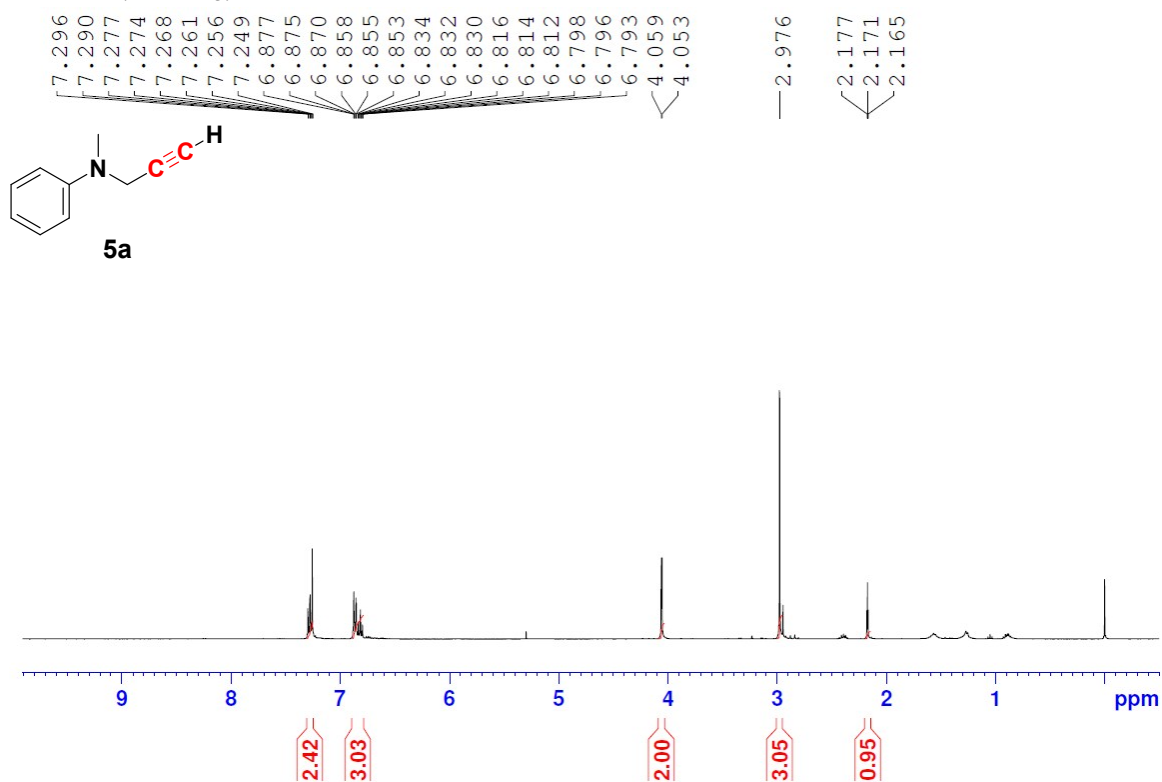

$^{13}\text{C}$  NMR,  $\text{CDCl}_3$ , 101 MHz

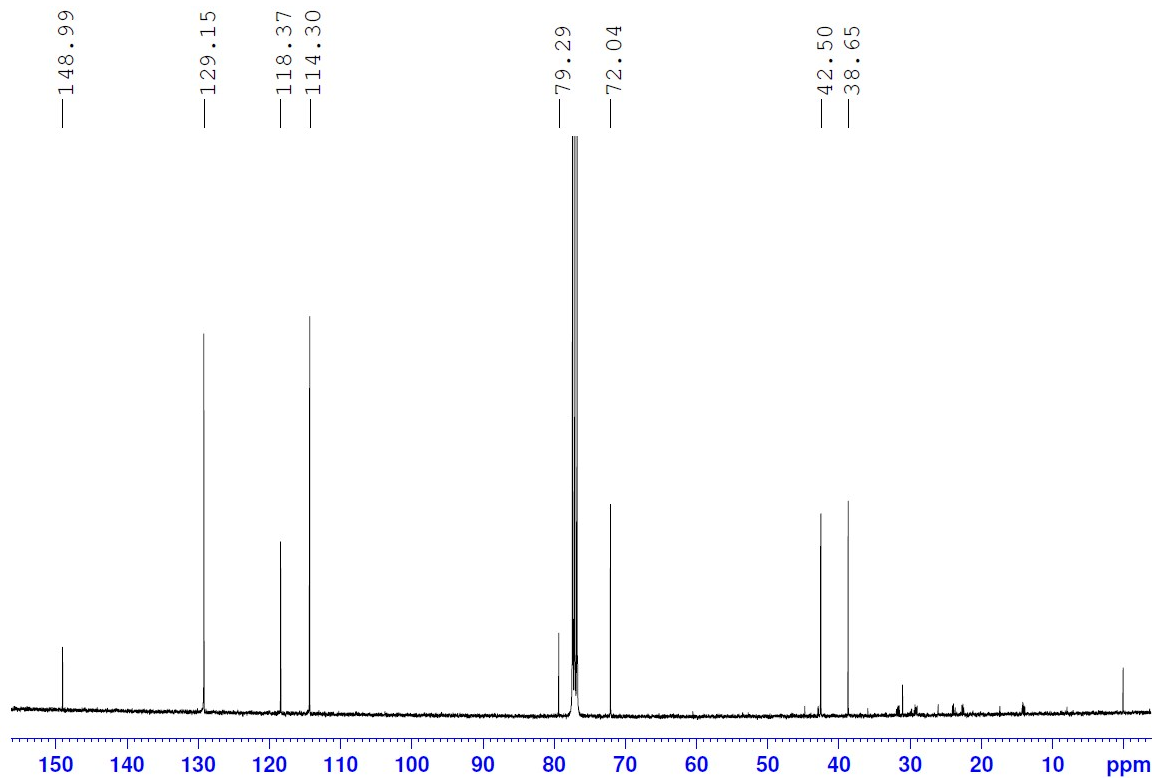

$^1\text{H}$  NMR,  $\text{CDCl}_3$ , 400 MHz

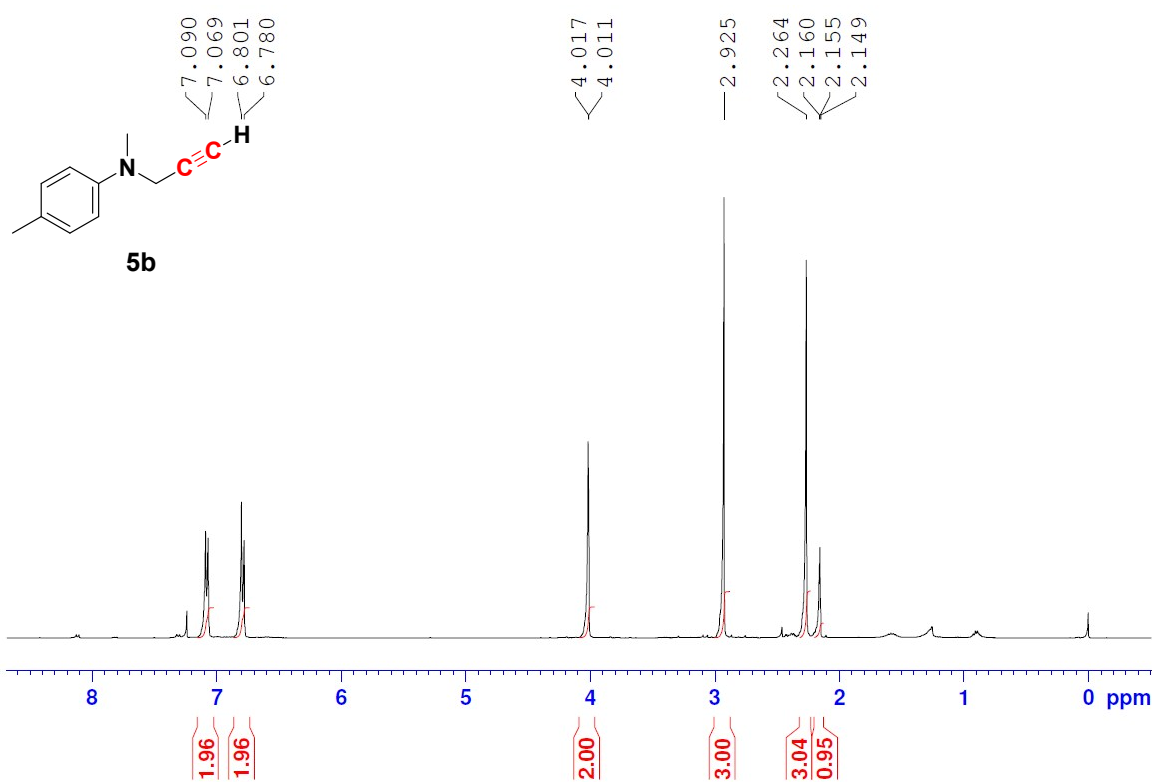

$^{13}\text{C}$  NMR,  $\text{CDCl}_3$ , 101 MHz

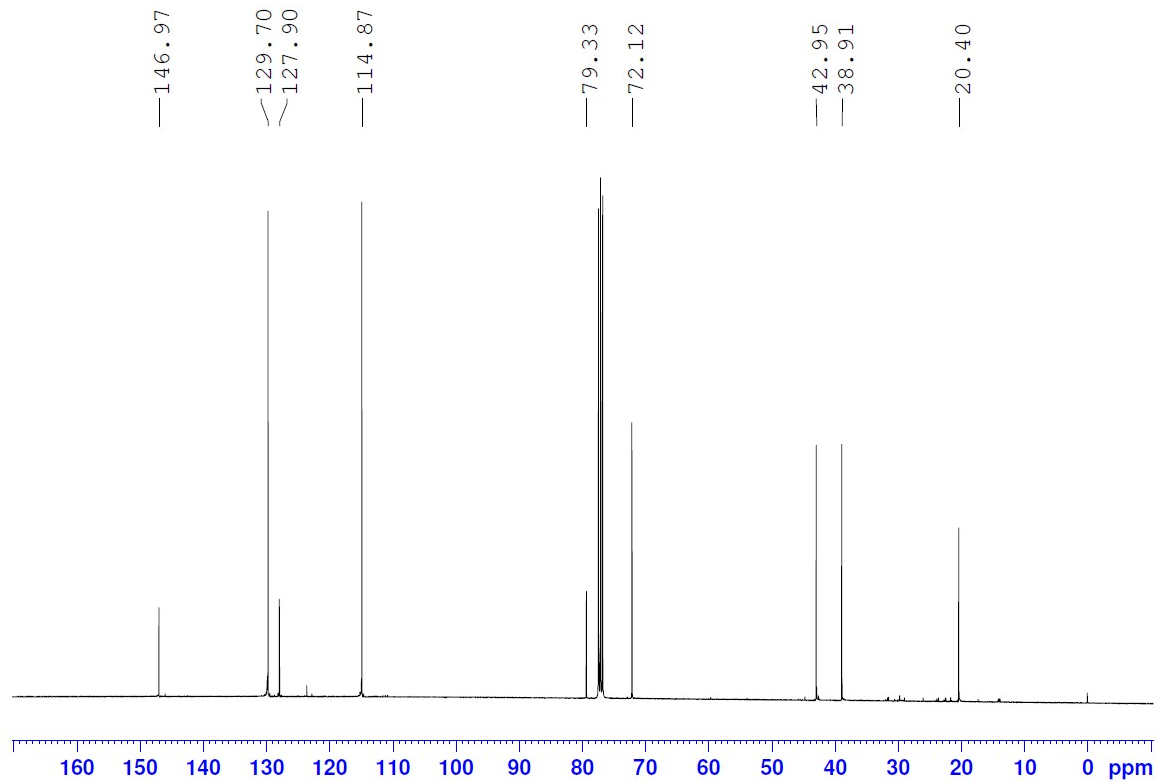

<sup>1</sup>H NMR, CDCl<sub>3</sub>, 400 MHz

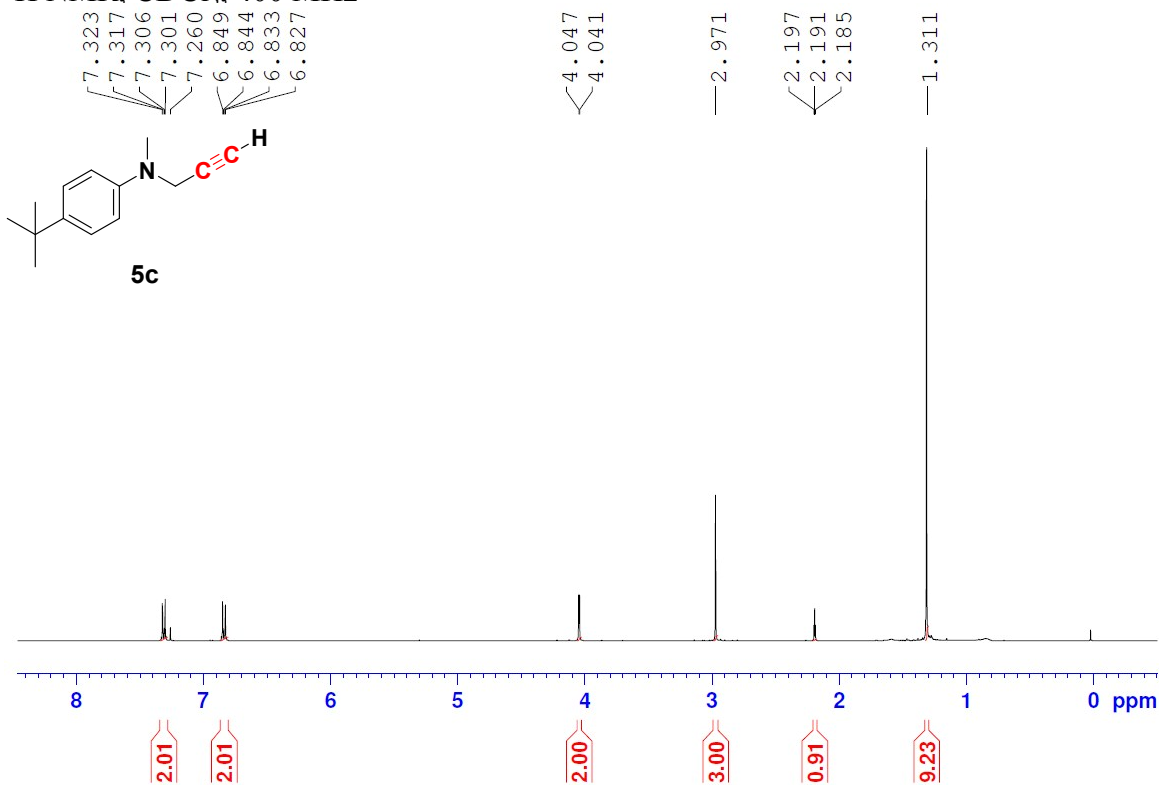

<sup>13</sup>C NMR, CDCl<sub>3</sub>, 101 MHz

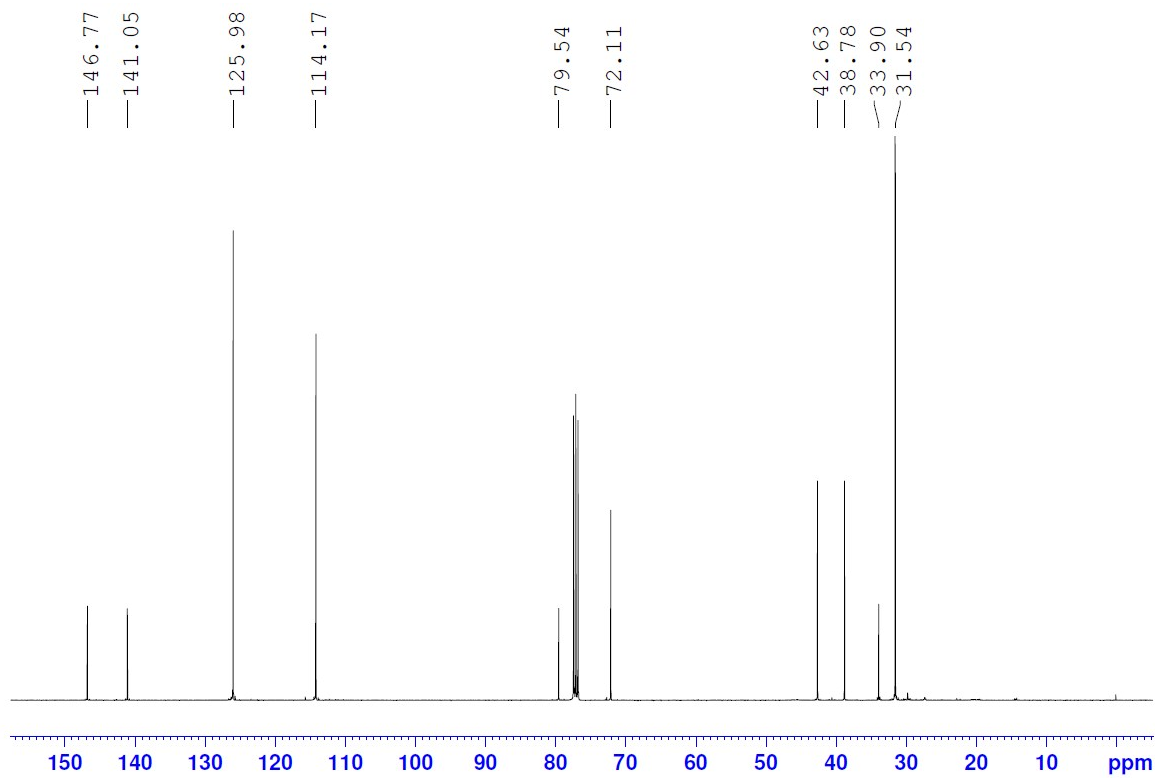

<sup>1</sup>H NMR, CDCl<sub>3</sub>, 400 MHz

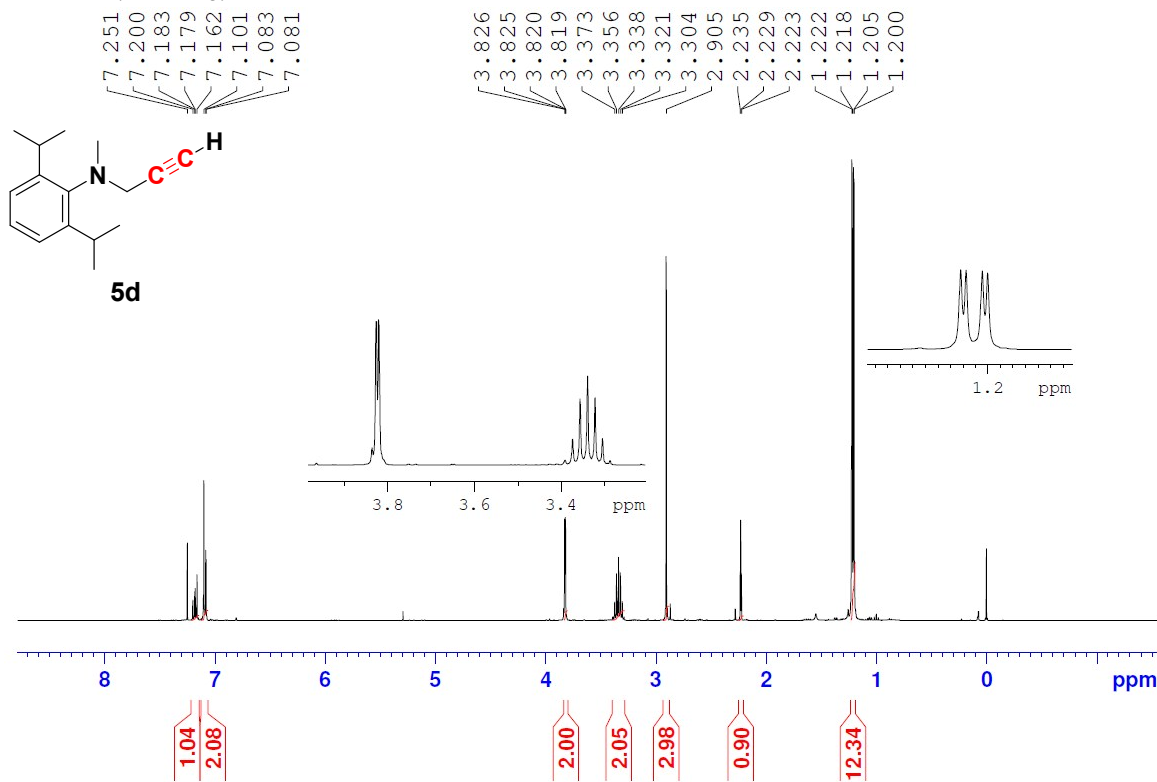

<sup>13</sup>C NMR, CDCl<sub>3</sub>, 101 MHz

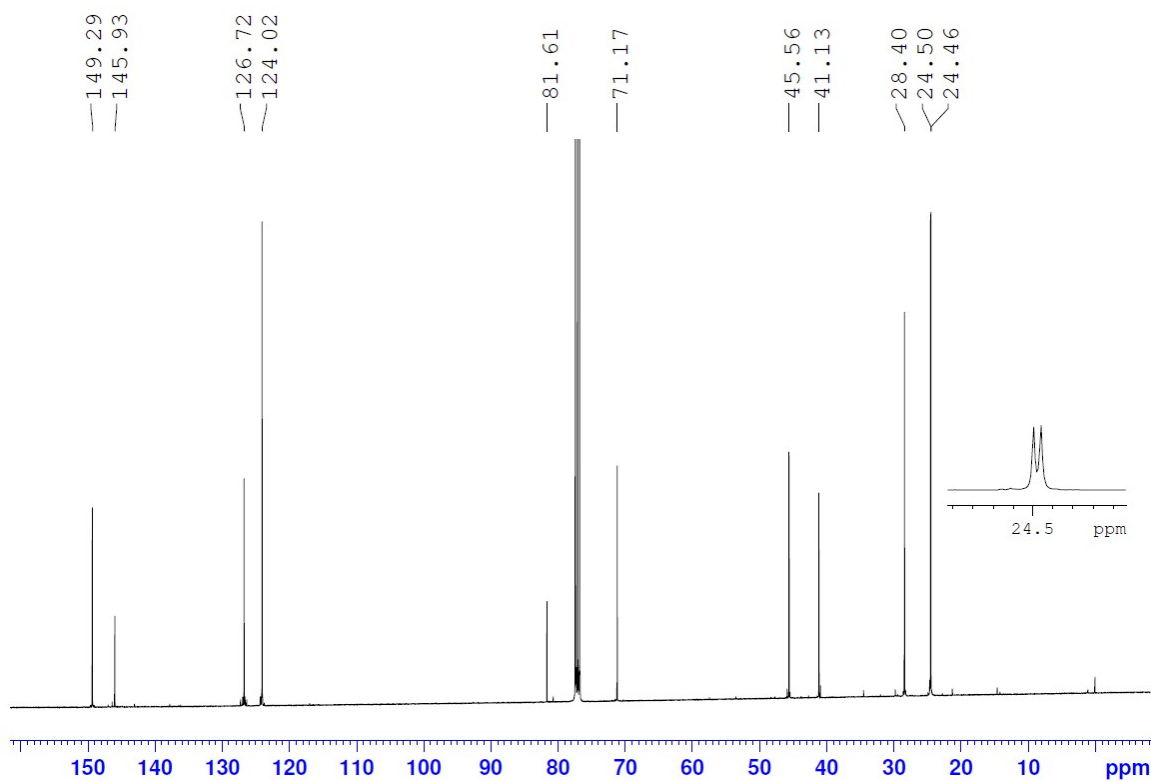

$^1\text{H}$  NMR,  $\text{CDCl}_3$ , 400 MHz

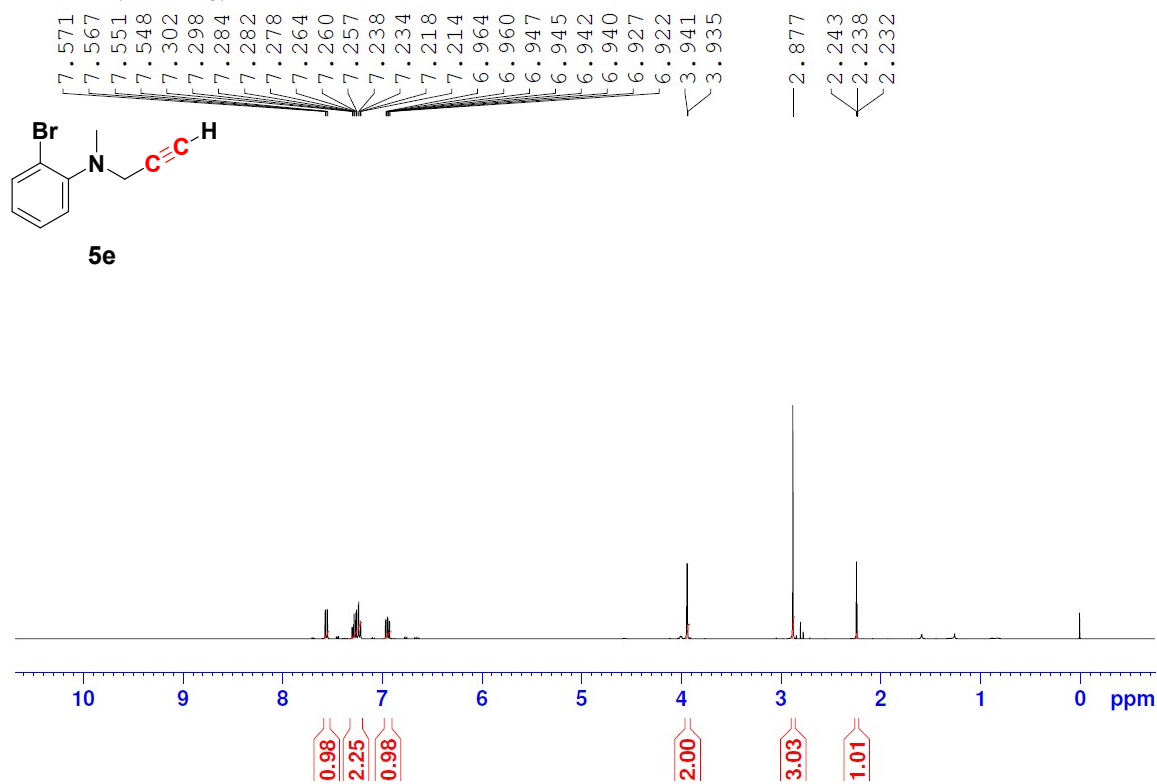

$^{13}\text{C}$  NMR,  $\text{CDCl}_3$ , 101 MHz

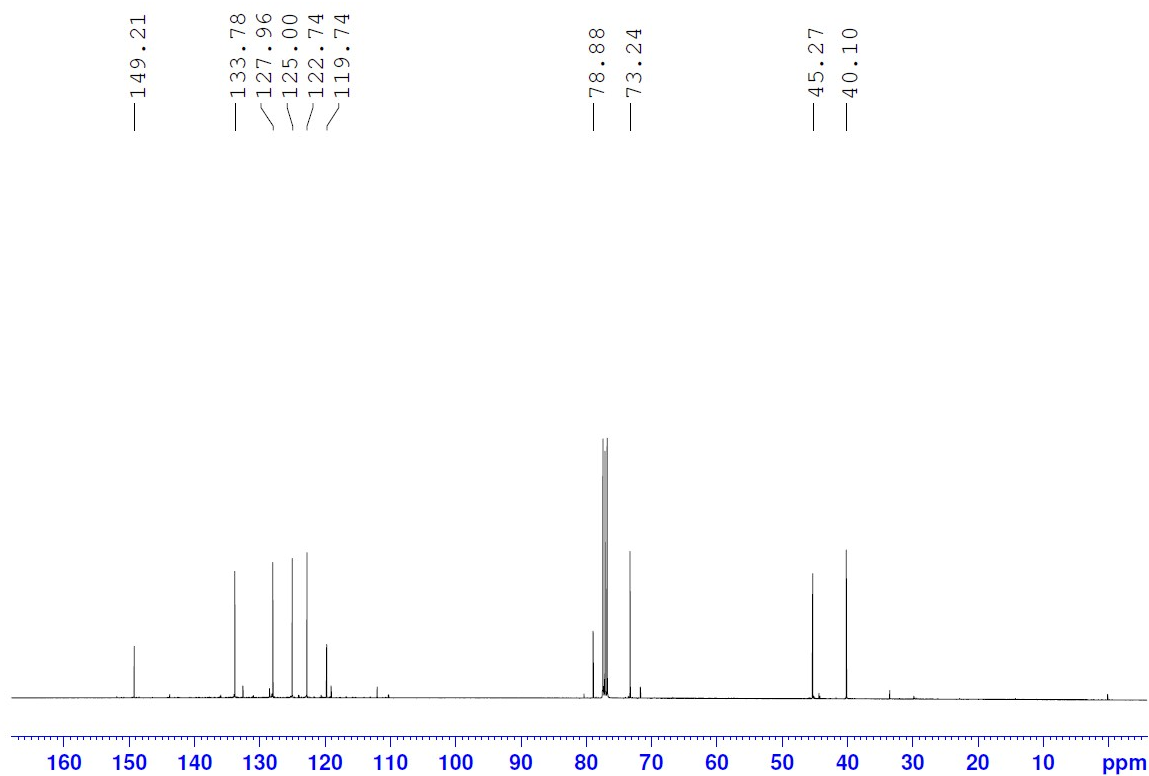

<sup>1</sup>H NMR, CDCl<sub>3</sub>, 400 MHz

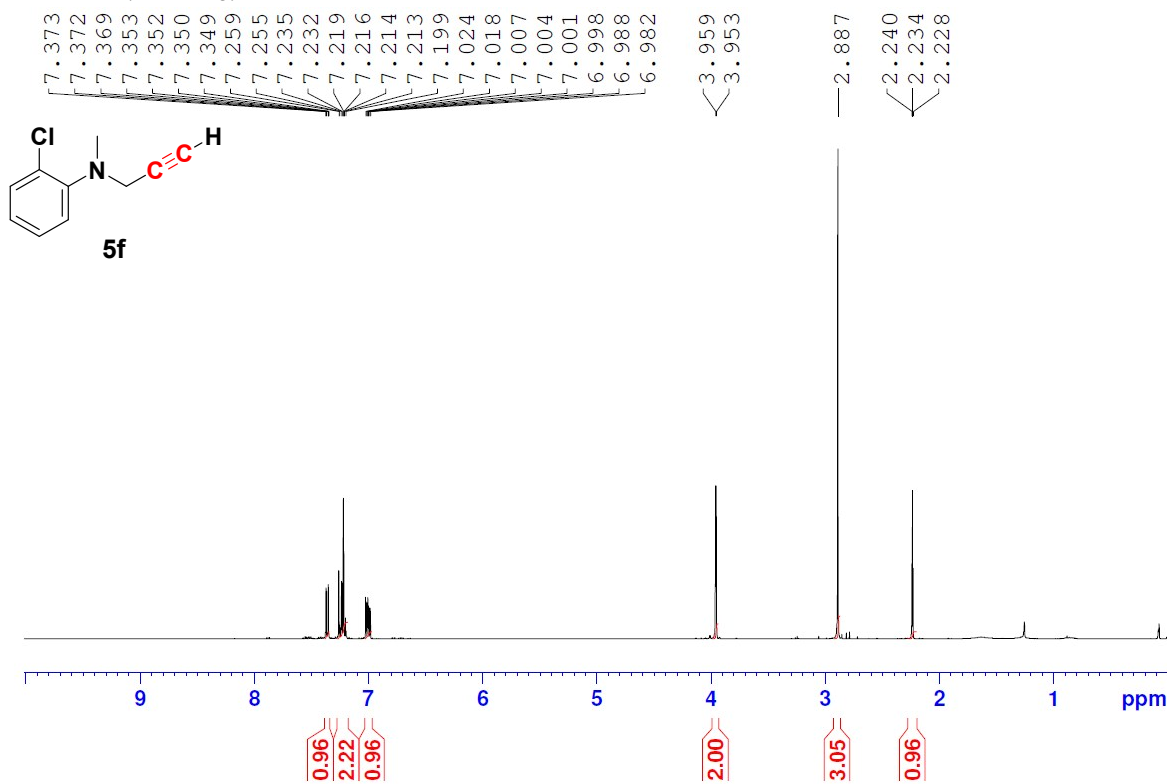

<sup>13</sup>C NMR, CDCl<sub>3</sub>, 101 MHz

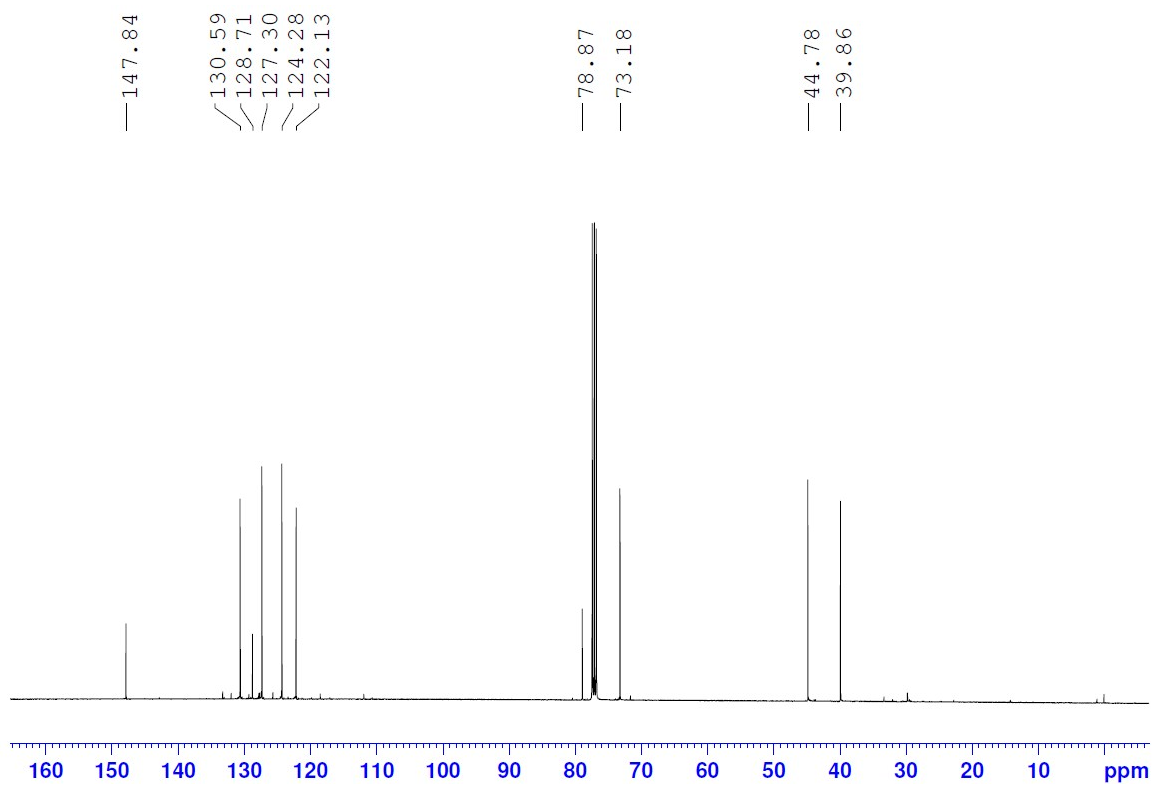



<sup>1</sup>H NMR, CDCl<sub>3</sub>, 400 MHz

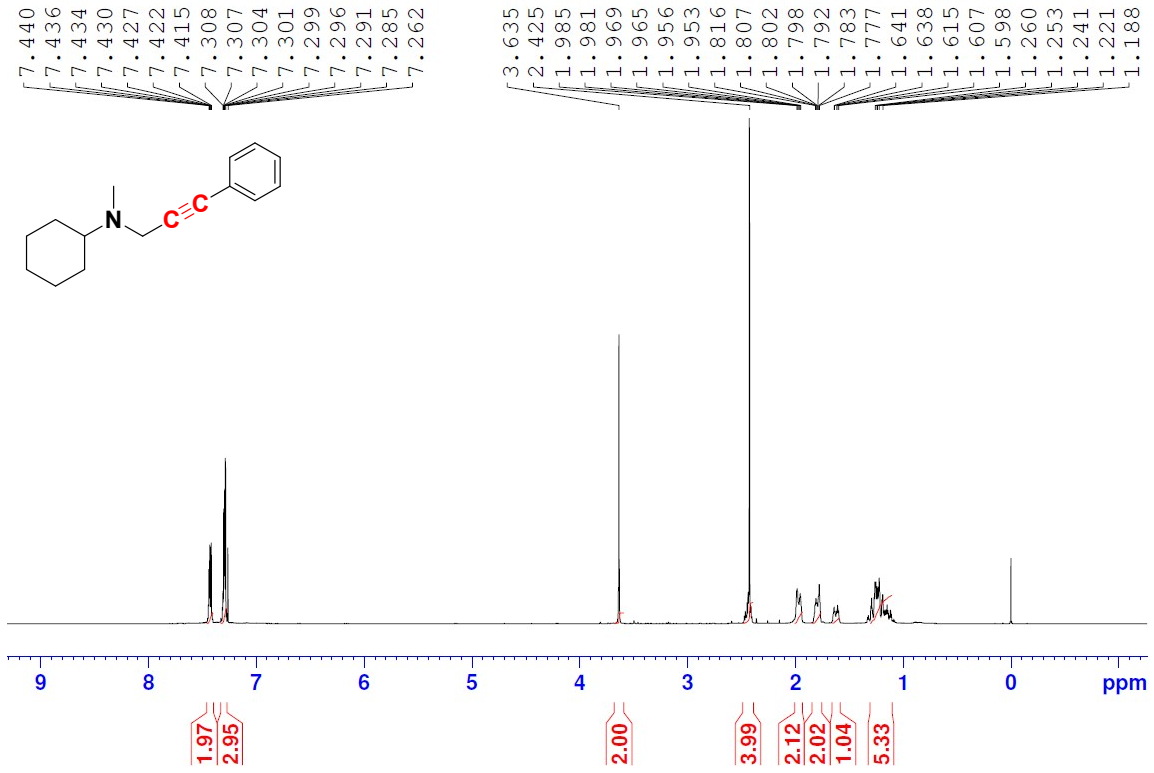

<sup>13</sup>C NMR, CDCl<sub>3</sub>, 101 MHz

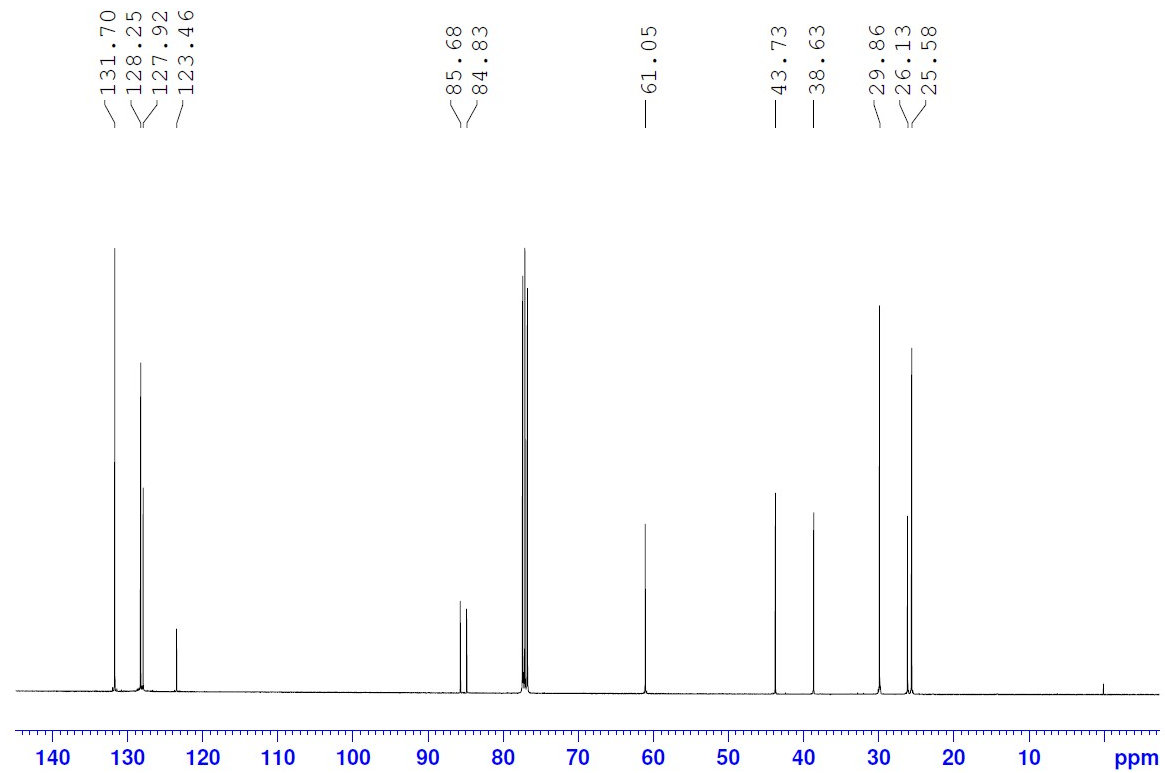

Supplement: c6gc00872k1.pdf [file c6gc00872k1.pdf]
